# Supplementary material for: Chemometric Approach for Profiling of Metabolites of Potential Antioxidant Activity in Apiaceae Species Based on LC-PDA-ESI-MS/MS and FT-NIR
Source: MDPI journal article supplement (doi:10.3390/separations10060347), 2023-06-08
Supplement: s1 [file s1]

---

## Supplementary materials

### List of Figures

|                                                                                                                          |    |
|--------------------------------------------------------------------------------------------------------------------------|----|
| Figure S1. Gallic acid standard calibration curve for the determination of TPC.....                                      | 2  |
| Figure S2. Quercetin standard calibration curve for the determination of TFC .....                                       | 2  |
| Figure S3. Trolox standard calibration curve for determination of DPPH .....                                             | 3  |
| Figure S4. Quercetin standard calibration curve for determination of ABTS .....                                          | 3  |
| Figure S5. Ferrous sulfate standard calibration curve for the determination of FRAP .....                                | 4  |
| Figure S6. BHA standard calibration curve for determination of CUPRAC .....                                              | 4  |
| Figure S7. LC-PDA chromatogram of metabolites detected in coriander ( <i>Coriandrum sativum</i> L ) negative mode .....  | 6  |
| Figure S8. LC-PDA chromatogram of metabolites detected in dill ( <i>Anethum graveolens</i> L.) negative mode .....       | 7  |
| Figure S9. LC-PDA chromatogram of metabolites detected in parsley ( <i>Petroselinum sativum</i> L.) negative mode .....  | 8  |
| Figure S10. LC-PDA chromatogram of metabolites detected in caraway ( <i>Carum carvi</i> L.) negative mode .              | 9  |
| Figure S11. LC-PDA chromatogram of metabolites detected in greater ammi ( <i>Ammi majus</i> L.) negative mode .....      | 10 |
| Figure S12. LC-PDA chromatogram of metabolites detected in fennel ( <i>Foeniculum vulgare</i> L.) negative mode .....    | 11 |
| Figure S13. LC-PDA chromatogram of metabolites detected in anise ( <i>Pimpinella anisum</i> L.) negative mode .....      | 12 |
| Figure S14. LC-PDA chromatogram of metabolites detected in celery ( <i>Apium graveolens</i> L.) negative mode .....      | 13 |
| Figure S15. LC-PDA chromatogram of metabolites detected in visnaga ( <i>Ammi visnaga</i> L.) negative mode .....         | 14 |
| Figure S16. LC-PDA chromatogram of metabolites detected in coriander ( <i>Coriandrum sativum</i> L ) negative mode ..... | 15 |
| Figure S17. LC-PDA chromatogram of metabolites detected in dill ( <i>Anethum graveolens</i> L.) negative mode .....      | 16 |
| Figure S18. LC-PDA chromatogram of metabolites detected in parsley ( <i>Petroselinum sativum</i> L.) negative mode ..... | 17 |
| Figure S19. FT-NIR absorbance average spectrum of Egyptian cultivar samples .....                                        | 18 |
| Figure S20. FT-NIR absorbance average spectrum of Egyptian versus German cultivar samples .....                          | 18 |

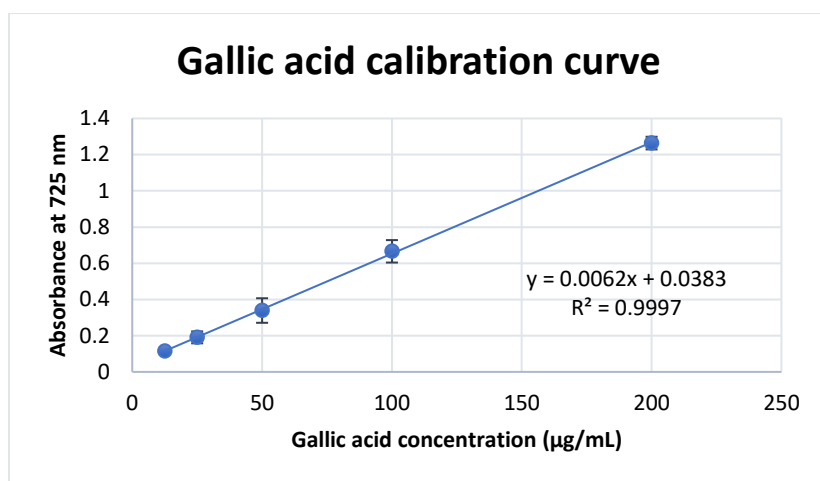

Figure S1. Gallic acid standard calibration curve for the determination of TPC

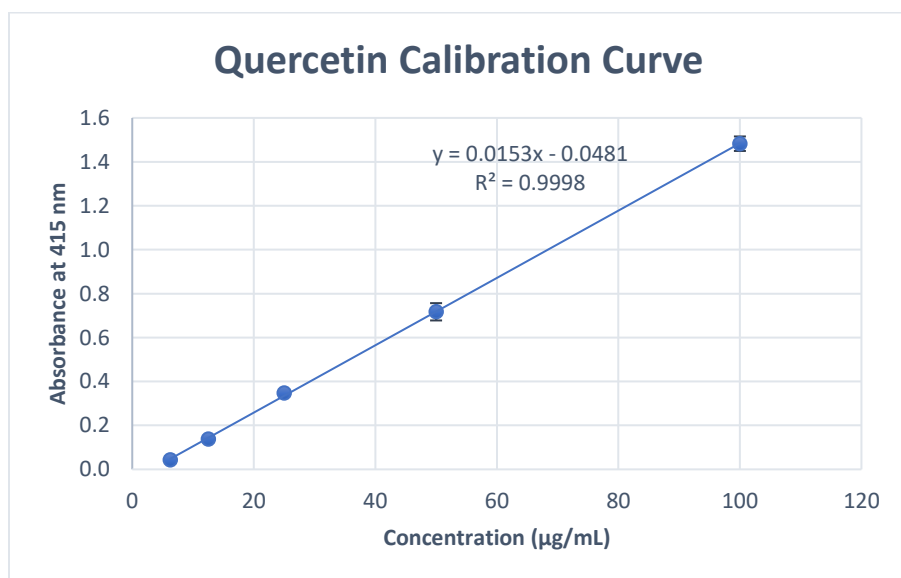

Figure S2. Quercetin standard calibration curve for the determination of TFC

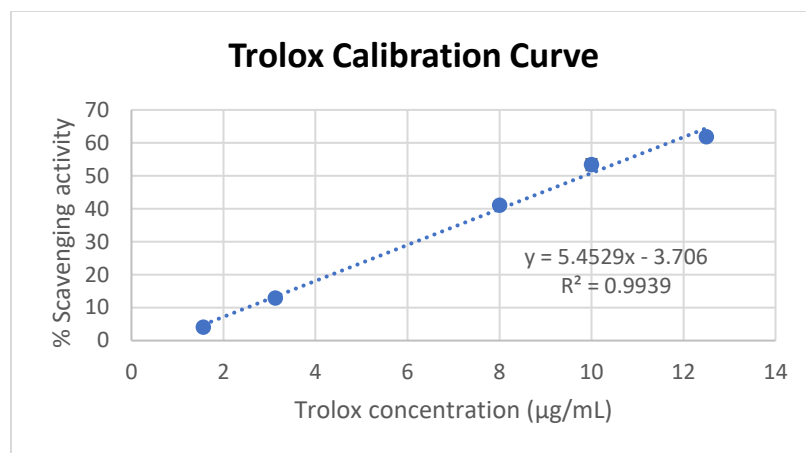

Figure S3. Trolox standard calibration curve for determination of DPPH

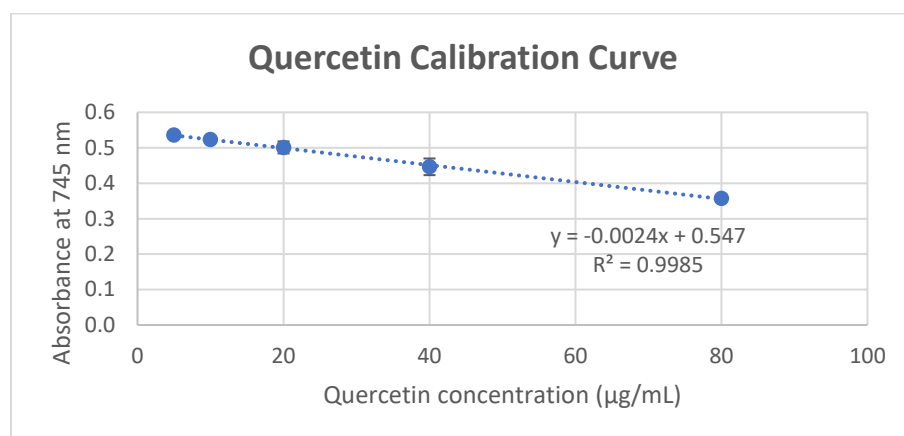

Figure S4. Quercetin standard calibration curve for determination of ABTS

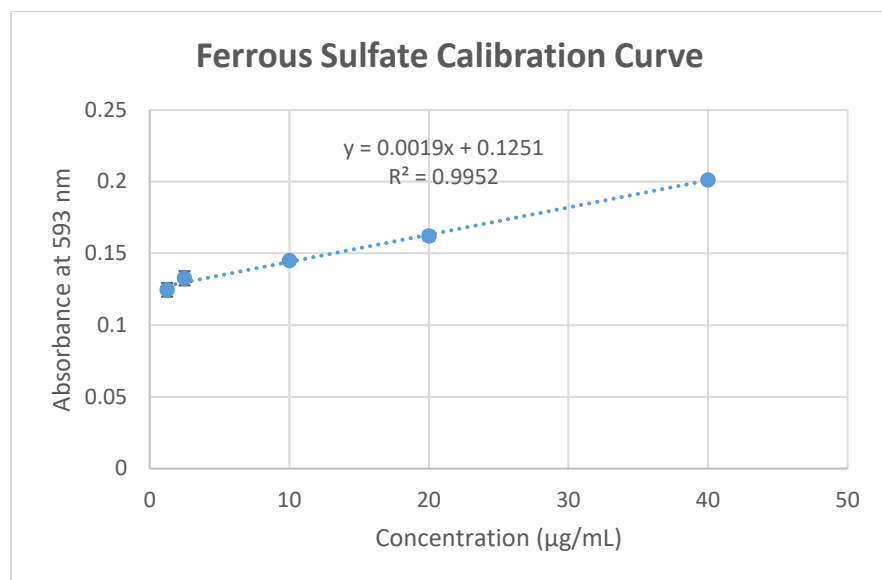

Figure S5. Ferrous sulfate standard calibration curve for the determination of FRAP

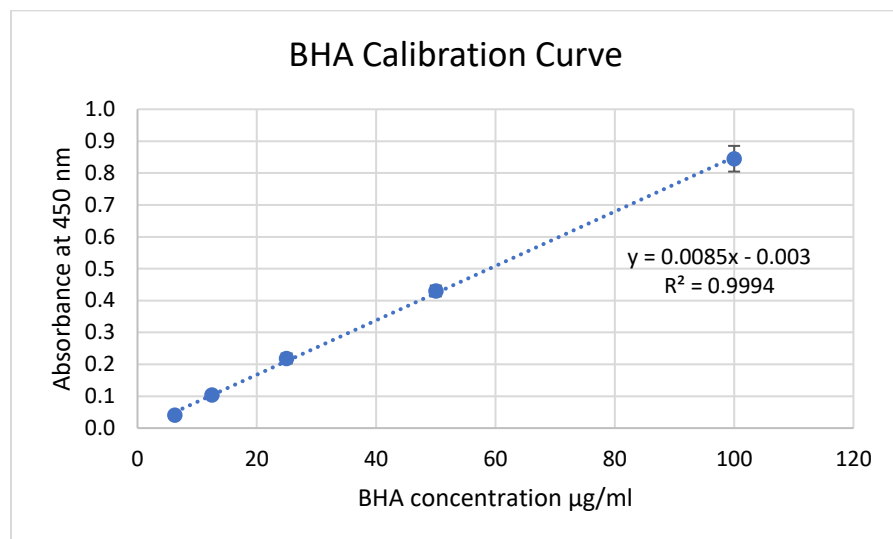

Figure S6. BHA standard calibration curve for determination of CUPRAC

---

---

## Total ion chromatogram plants of Egyptian cultivar

### Coriander (*Coriandrum sativum* L.)

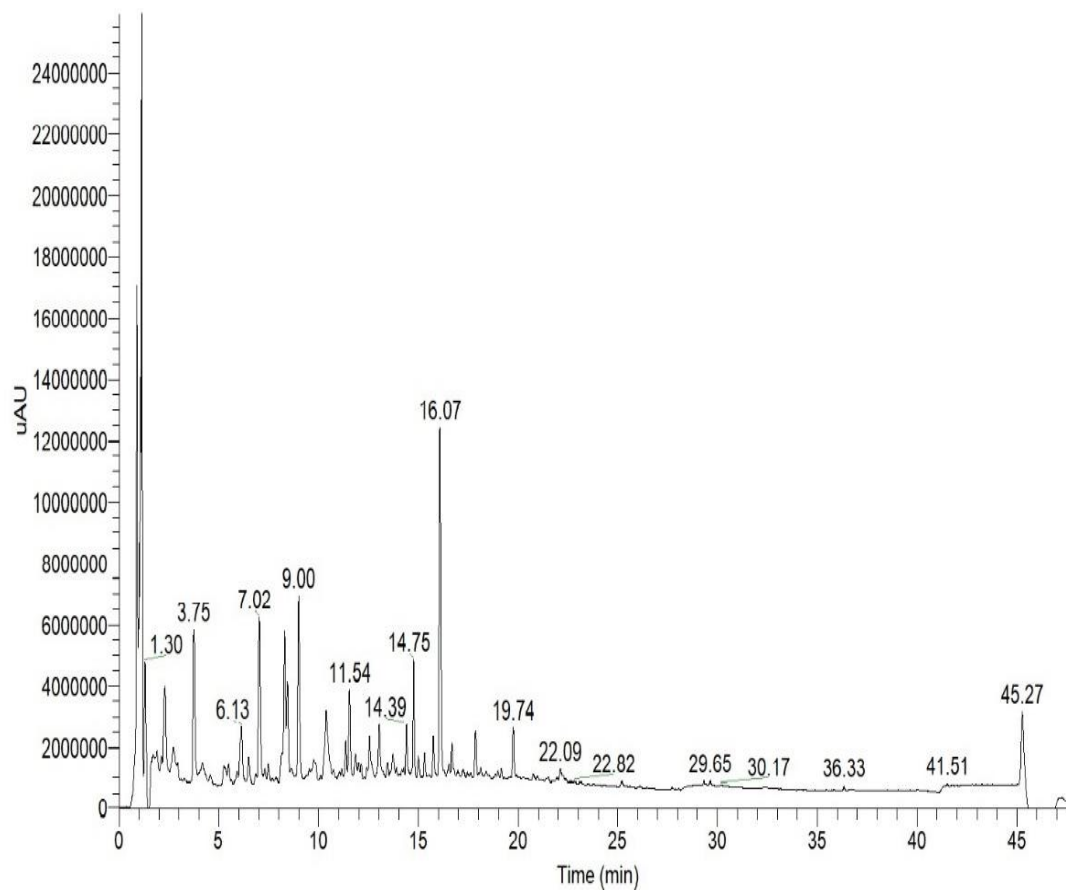

Figure S7. LC-PDA chromatogram of metabolites detected in coriander (*Coriandrum sativum* L.) negative mode

**Dill (*Annethum graveolens L.*)**

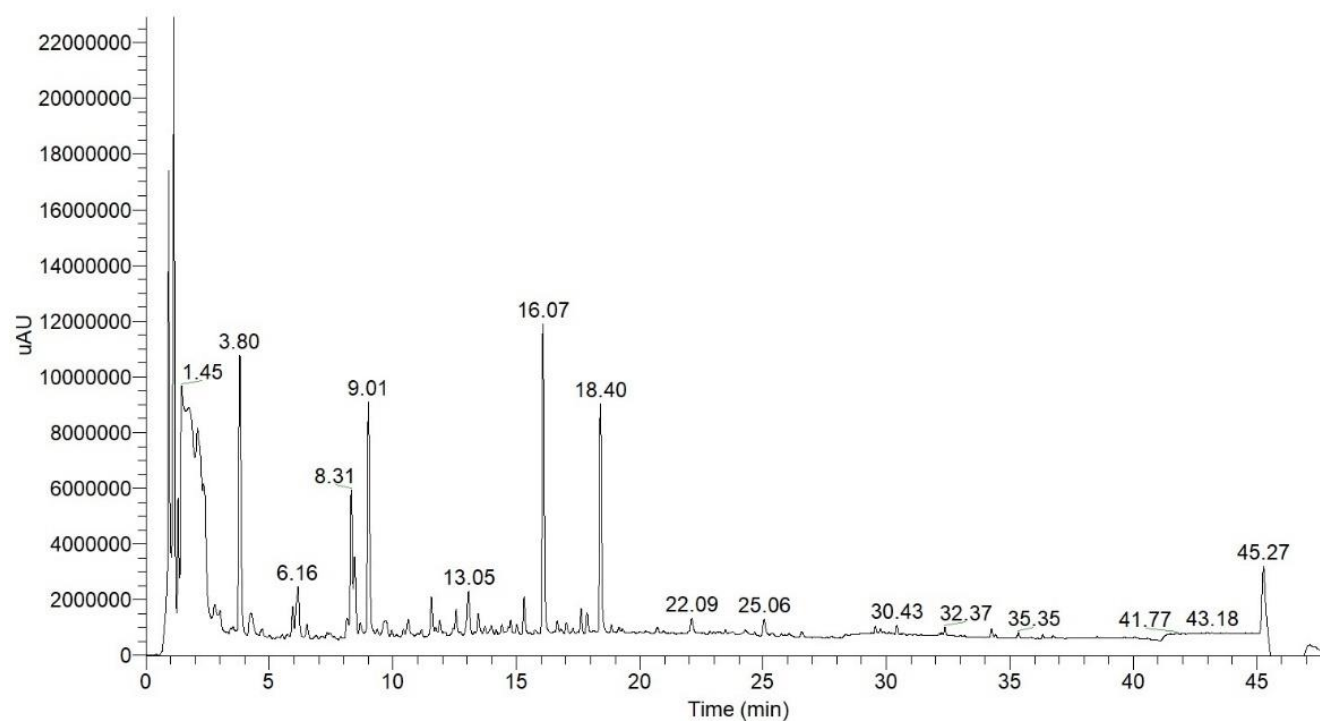

Figure S8. LC-PDA chromatogram of metabolites detected in dill (*Annethum graveolens L.*) negative mode

**Parsley (*Petroselinum sativum* L.)**

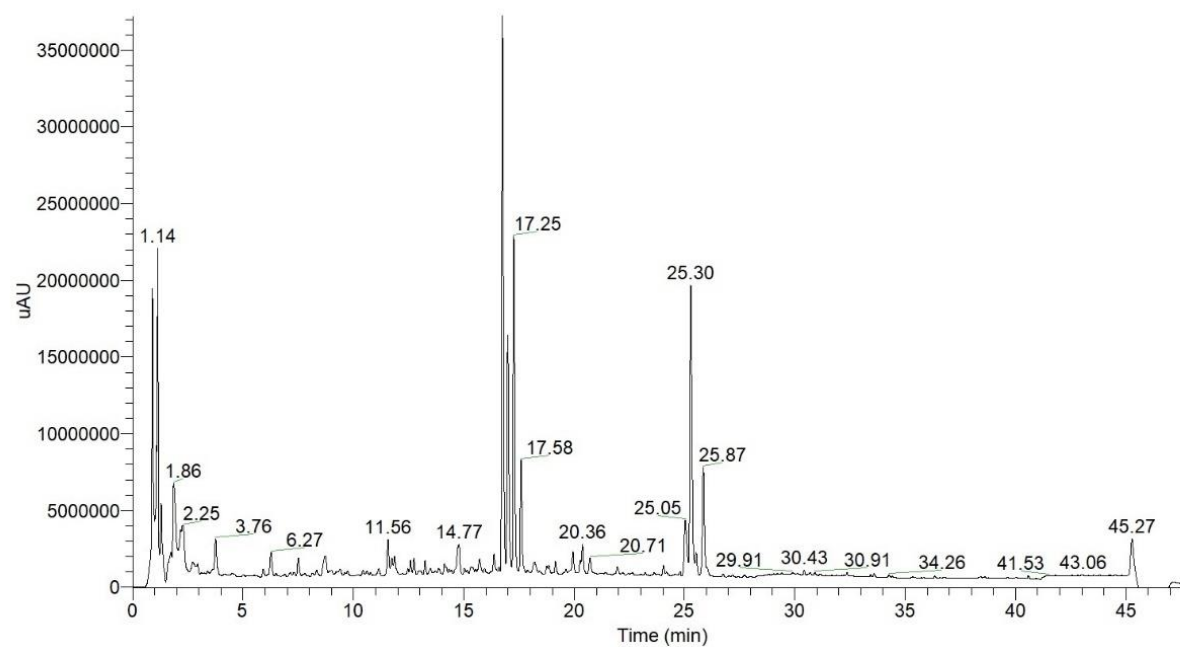

Figure S9. LC-PDA chromatogram of metabolites detected in parsley (*Petroselinum sativum* L.) negative mode



---

**Caraway (*Carum carvi* L.)**

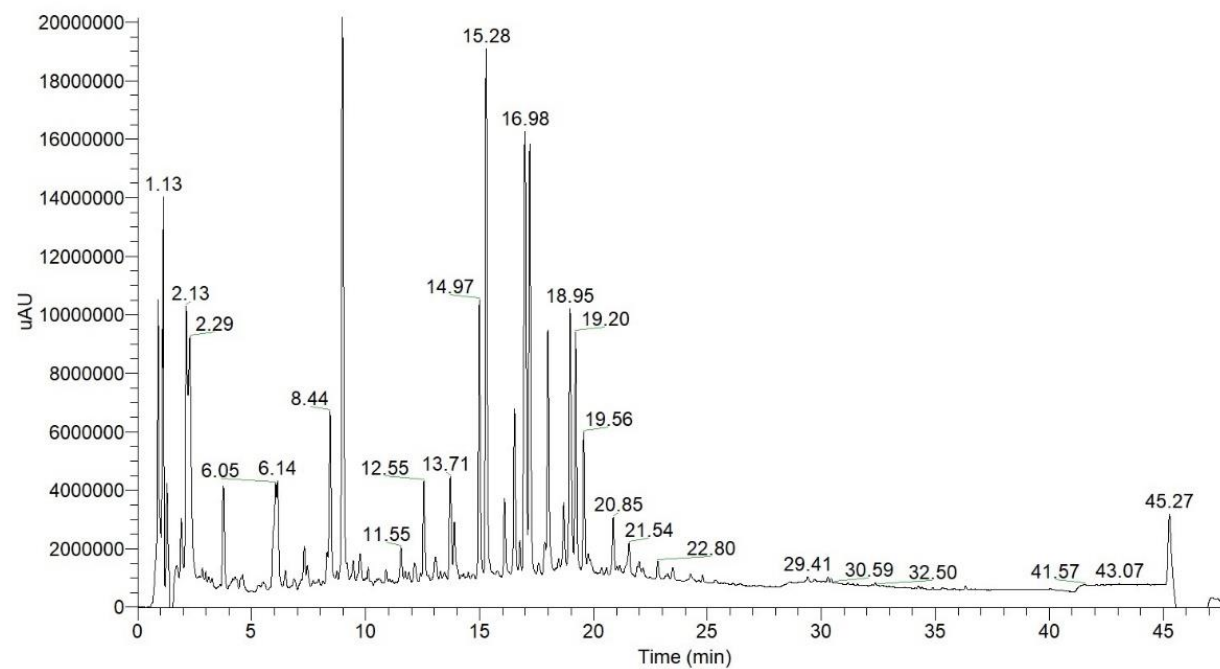

Figure S10. LC-PDA chromatogram of metabolites detected in caraway (*Carum carvi* L.) negative mode

---

**Greater ammi (*Ammi majus* L.)**

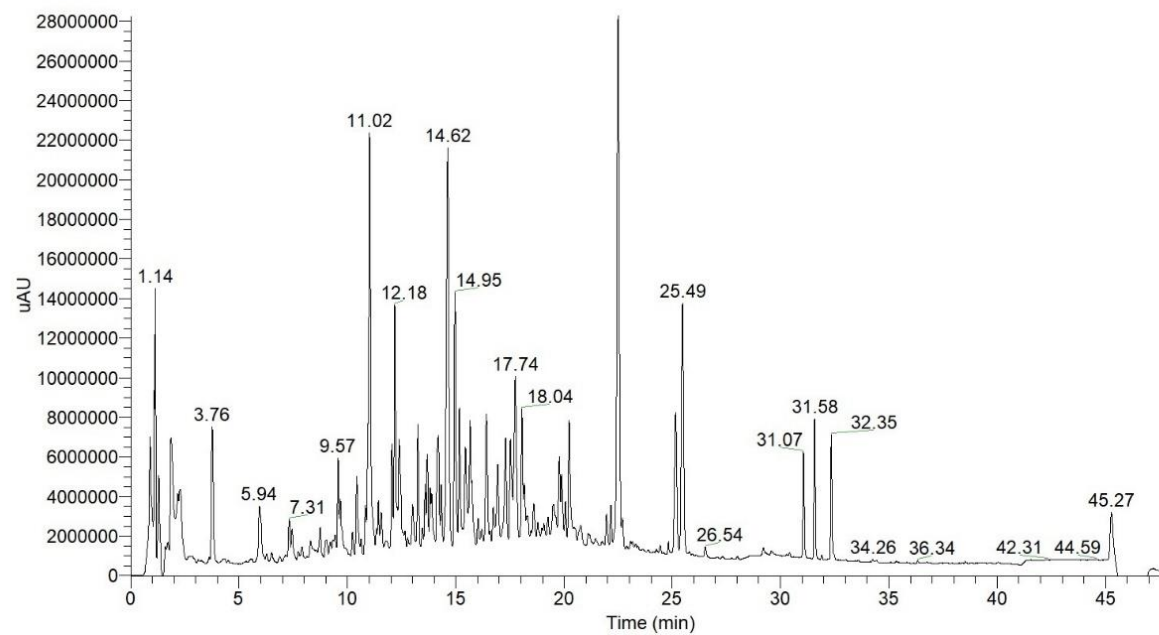

Figure S11. LC-PDA chromatogram of metabolites detected in greater ammi (*Ammi majus* L.) negative mode

**Fennel (*Foeniculum vulgare* L.)**

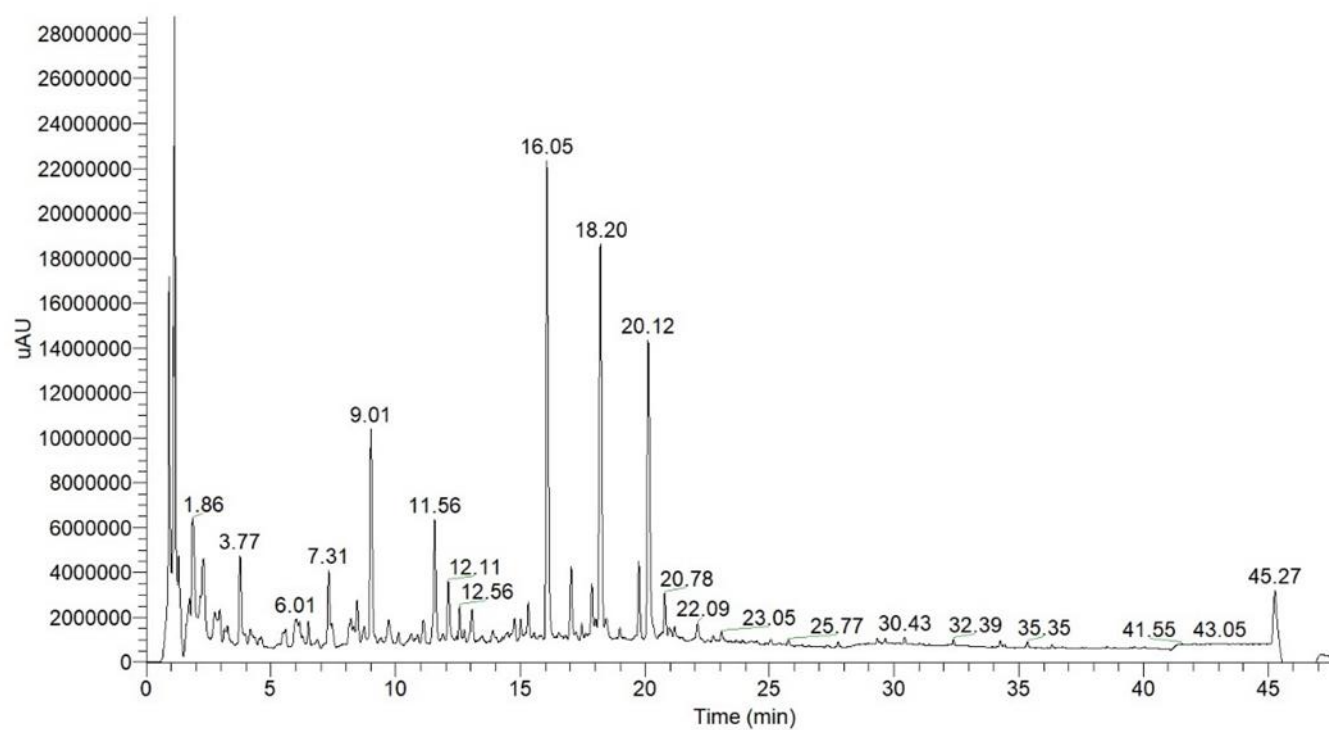

Figure S12. LC-PDA chromatogram of metabolites detected in fennel (*Foeniculum vulgare* L.) negative mode

**Anise (*Pimpinella anisum* L.)**

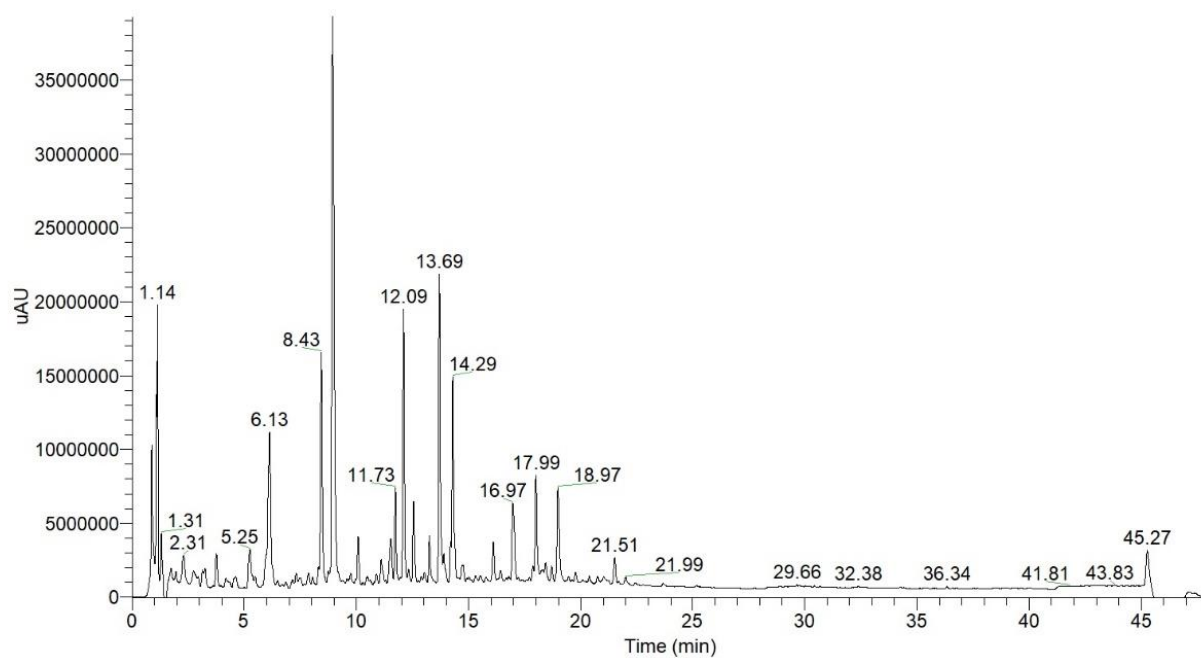

Figure S13. LC-PDA chromatogram of metabolites detected in anise (*Pimpinella anisum* L.) negative mode

**Celery (*Apium graveolens* L.)**

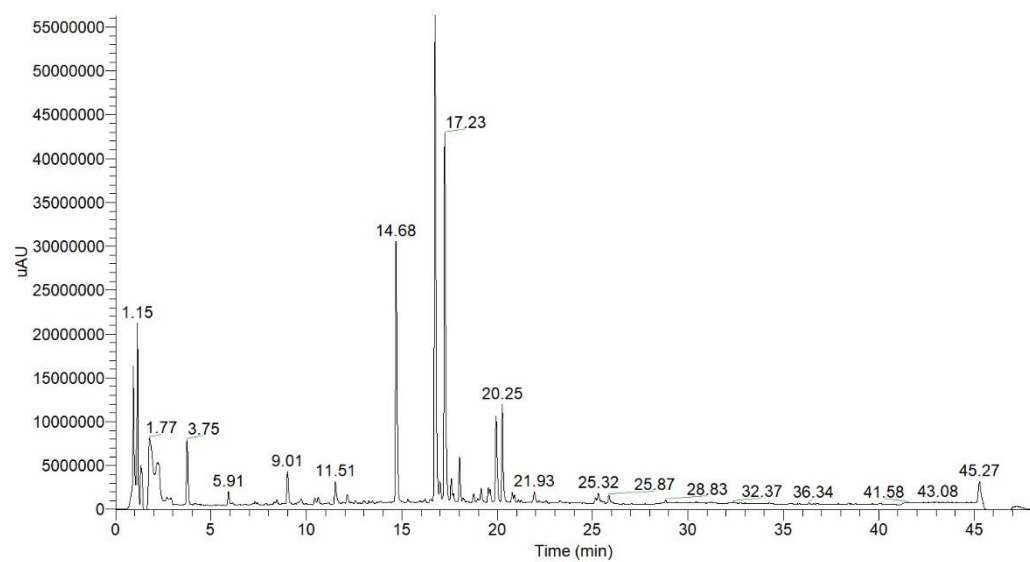

Figure S14. LC-PDA chromatogram of metabolites detected in celery (*Apium graveolens* L.) negative mode

**Visnaga (*Ammi visnaga* L.)**

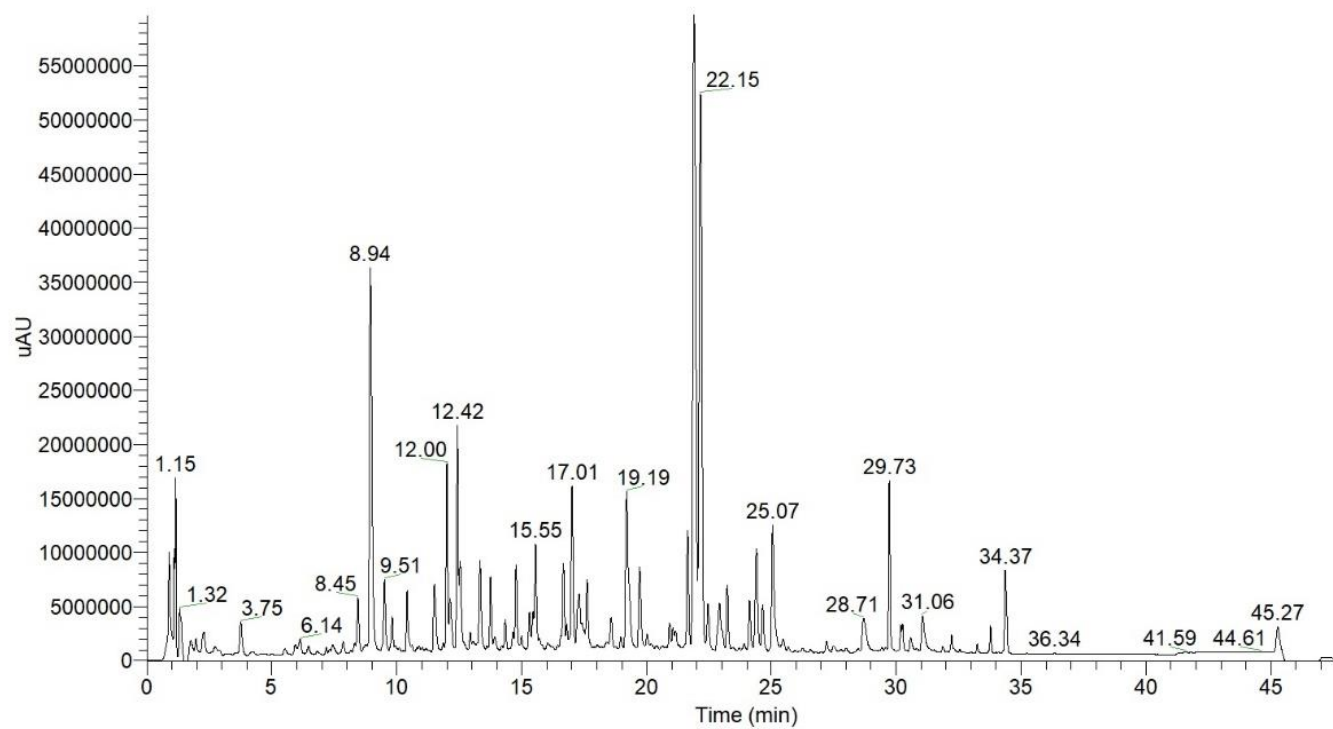

Figure S15.LC-PDA chromatogram of metabolites detected in visnaga (*Ammi visnaga* L.) negative mode

## Plants of German cultivar total ion chromatogram

Coriander (*Coriandrum sativum* L.)

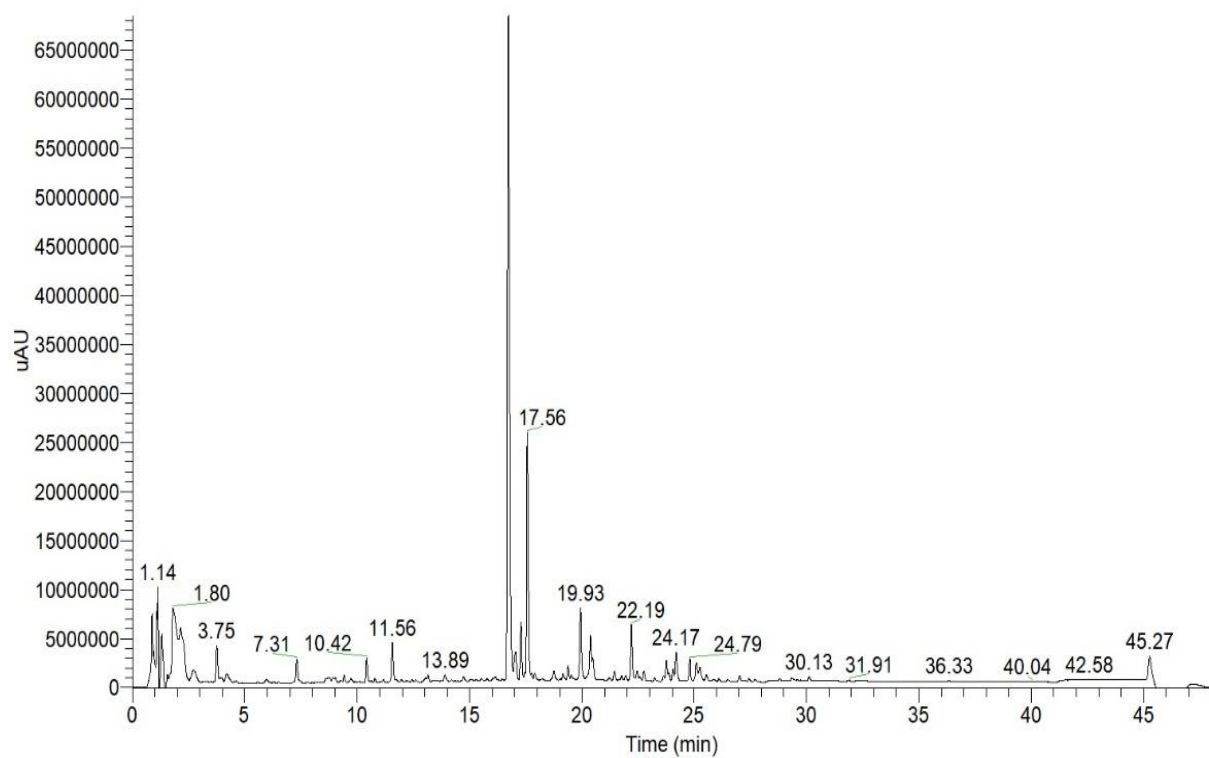

Figure S16. LC-PDA chromatogram of metabolites detected in coriander (*Coriandrum sativum* L.) negative mode

**Dill (*Annethum graveolens* L.)**

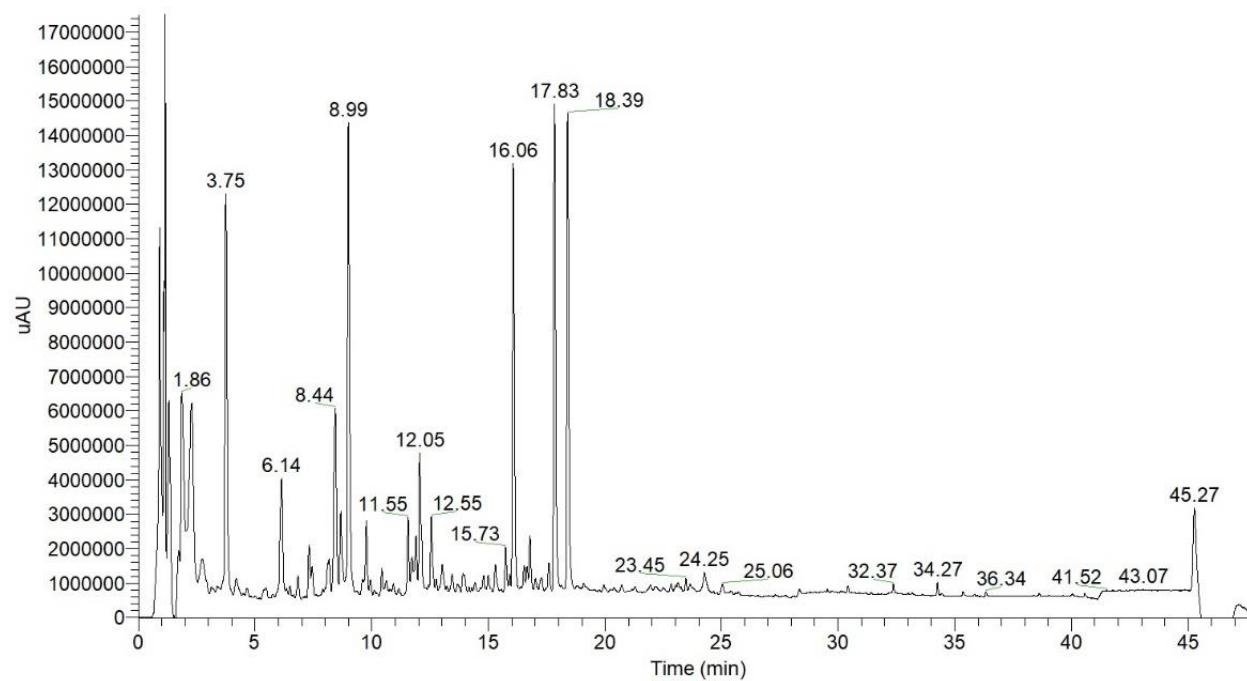

Figure S17. LC-PDA chromatogram of metabolites detected in dill (*Annethum graveolens* L.) negative mode



**Parsley (*Petroselinum sativum* L.)**

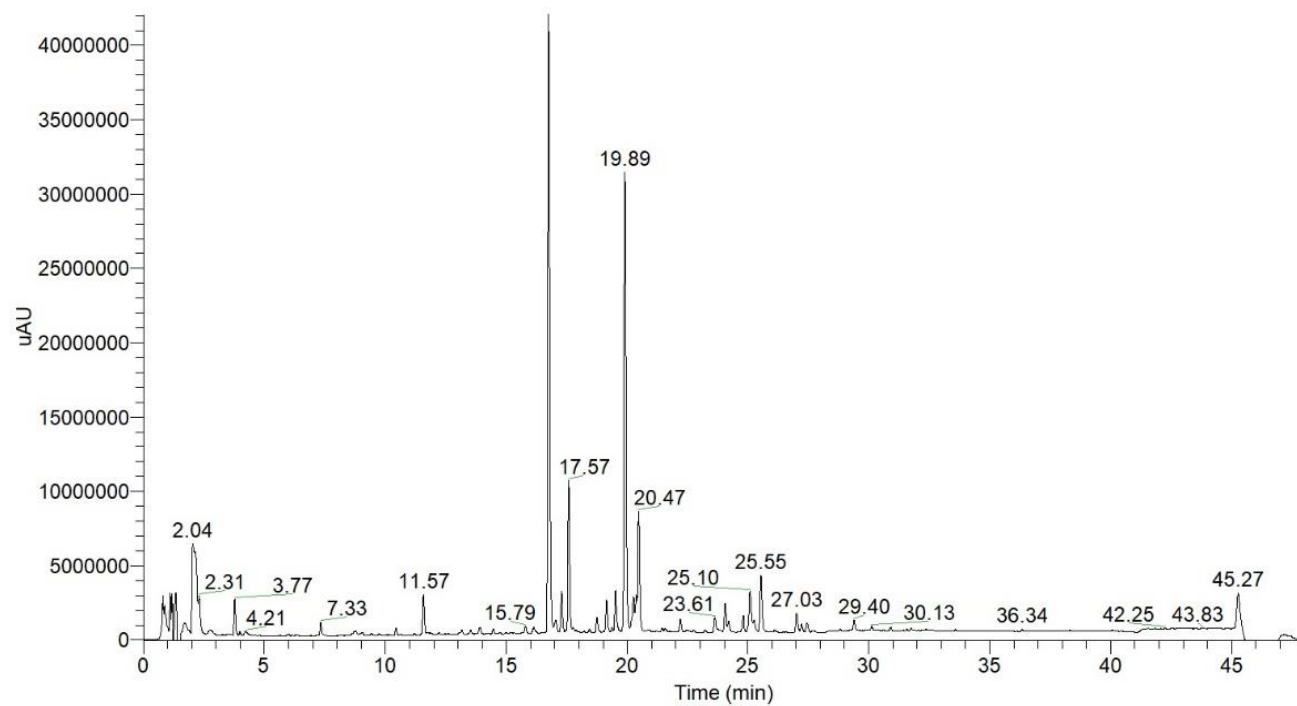

Figure S18. LC-PDA chromatogram of metabolites detected in parsley (*Petroselinum sativum* L.) negative mode

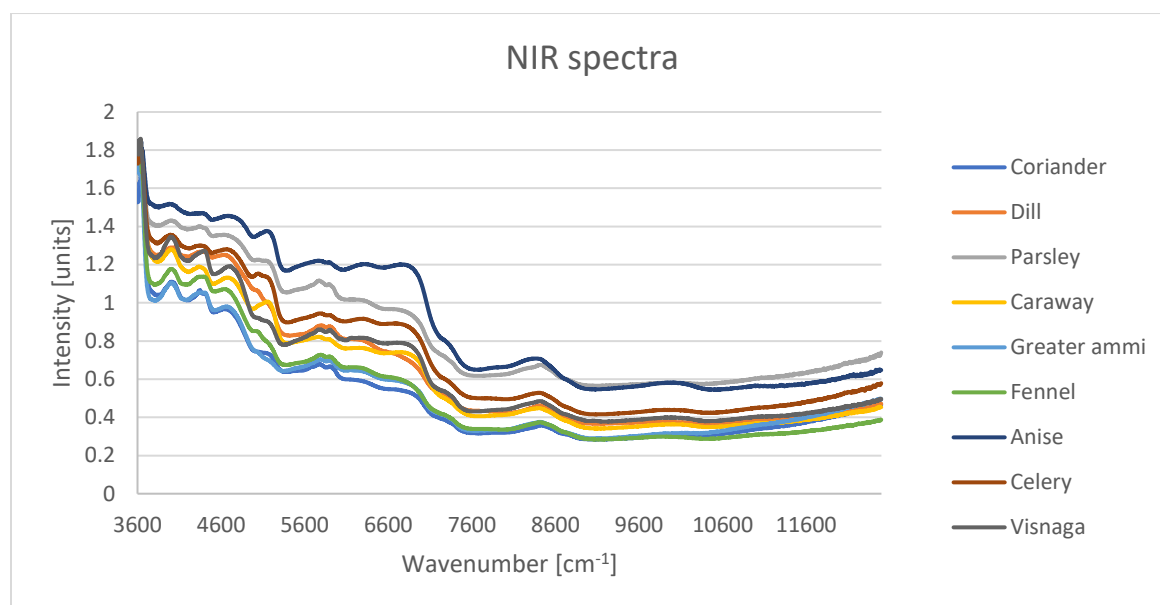

Figure S19. FT-NIR absorbance average spectrum of Egyptian cultivar samples

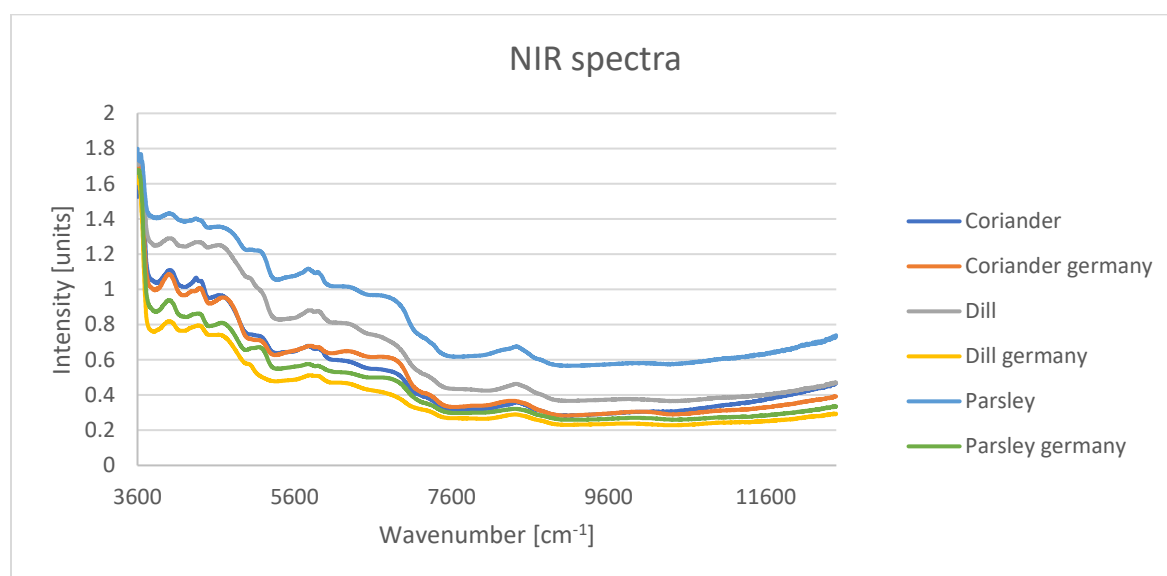

Figure S20. FT-NIR absorbance average spectrum of Egyptian *versus* German cultivar samples

---

## List of Tables

|                                                                                                                                                                    |    |
|--------------------------------------------------------------------------------------------------------------------------------------------------------------------|----|
| Table S1: Peaks assignment using LC-PDA-ESI-MS/MS of metabolites detected in detected in alcoholic fraction of water extract of Egyptian and German extracts ..... | 20 |
| Table S2. The partial least squares regression model parameters used for prediction of Egyptian cultivar LC-PDA-ESI-MS/MS data .....                               | 30 |
| Table 3S. The partial least squares regression model parameters used for prediction of Egyptian cultivar NIR data.....                                             | 30 |
| Table S4. The partial least squares regression model parameters used for prediction of Egyptian cultivar and German cultivar LC-PDA-ESI-MS/MS data .....           | 31 |
| Table S5. The partial least squares regression model parameters used for prediction of Egyptian cultivar and German cultivar NIR data.....                         | 32 |
| Table S6: Antioxidant assays one way ANOVA results.....                                                                                                            | 33 |
| Table S7: Antioxidant assays one way ANOVA post hoc Tukey results .....                                                                                            | 33 |

**Table S1:** Peaks assignment using LC-PDA-ESI-MS/MS of metabolites detected in detected in alcoholic fraction of water extract of Egyptian and German extracts

| Metabolite                                                                                                                                                                | Molecular formula                                             | Rt (min) | [M-H] <sup>-</sup> /<br>[M+M] <sup>+</sup><br>(m/z) | Molecular weight (Da) | MS/MS fragments                           | References |
|---------------------------------------------------------------------------------------------------------------------------------------------------------------------------|---------------------------------------------------------------|----------|-----------------------------------------------------|-----------------------|-------------------------------------------|------------|
| Table 1A. Peaks assignment using LC-PDA-ESI-MS/MS of metabolites detected in detected in alcoholic fraction of water extract of Coriander ( <i>Coriandrum sativum</i> L.) |                                                               |          |                                                     |                       |                                           |            |
| Quinic acid                                                                                                                                                               | C <sub>7</sub> H <sub>12</sub> O <sub>6</sub>                 | 1.11     | 191.0553                                            | 192.0628              | 191.06,108.02,93.03,85.03                 | [33]       |
| Phenylalanine                                                                                                                                                             | C <sub>9</sub> H <sub>11</sub> NO <sub>2</sub>                | 2.31     | 166.0860                                            | 165.0784              | 103.03,95.05,91.05,77.04,53.03            | [34]       |
| Tryptophan                                                                                                                                                                | C <sub>11</sub> H <sub>12</sub> N <sub>2</sub> O <sub>2</sub> | 3.76     | 205.0968                                            | 204.0898              | 142.06,130.07,117.05,115.05,91.05         | [35,36]    |
| Neochlorogenic acid (5-O-caffeoylquinic acid)                                                                                                                             | C <sub>16</sub> H <sub>18</sub> O <sub>9</sub>                | 6.13     | 353.0878                                            | 354.0953              | 191.06,135.04,93.03,85.02                 | Standard   |
| 2- Isopropylmalic acid                                                                                                                                                    | C <sub>7</sub> H <sub>12</sub> O <sub>5</sub>                 | 6.5      | 175.0603                                            | 176.0675              | 68.99,90.07,99.92,17.86,161.05            | [37]       |
| Caffeic acid (3,4-dihydroxycinnamic acid)                                                                                                                                 | C <sub>9</sub> H <sub>8</sub> O <sub>4</sub>                  | 8.29     | 179.0340                                            | 180.0415              | 134.04,108.02,89.03,65.00                 | Standard   |
| Chlorogenic acid (3-O-caffeoylquinic acid)                                                                                                                                | C <sub>16</sub> H <sub>18</sub> O <sub>9</sub>                | 8.44     | 353.0877                                            | 354.0953              | 191.06,171.02,127.03,93.03,85.02          | Standard   |
| Rutin (quercetin 3-O-rutinoside)                                                                                                                                          | C <sub>27</sub> H <sub>30</sub> O <sub>16</sub>               | 14.8     | 609.1527                                            | 610.1527              | 300.03,271.02,255.03,178.99,151.00        | Standard   |
| Kämpferol-3-O-rutinoside                                                                                                                                                  | C <sub>27</sub> H <sub>30</sub> O <sub>15</sub>               | 15.79    | 593.1582                                            | 594.1582              | 284.03,255.03,227.03                      | [38,39]    |
| Quercetin3-O-glucuronide                                                                                                                                                  | C <sub>21</sub> H <sub>18</sub> O <sub>13</sub>               | 16.11    | 477.0671                                            | 478.0747              | 301.03,255.02,178.99,151.00,121.02,107.01 | [40]       |
| Ferulolylquinic acid                                                                                                                                                      | C <sub>17</sub> H <sub>20</sub> O <sub>9</sub>                | 9.07,1.6 | 367.1035                                            | 368.1108              | 191.05,134.03,93.03                       | [41]       |
| Table 1B. Peaks assignment using LC-PDA-ESI-MS/MS of metabolites detected in detected in alcoholic fraction of water extract of dill ( <i>Anethum graveolens</i> L.)      |                                                               |          |                                                     |                       |                                           |            |
| Quinic acid                                                                                                                                                               | C <sub>7</sub> H <sub>12</sub> O <sub>6</sub>                 | 1.12     | 191.0553                                            | 192.0625              | 191.06,108.02,93.03,85.03                 | [33]       |

|                                                                                                                                                                              |                                                               |               |          |          |                                                    |           |
|------------------------------------------------------------------------------------------------------------------------------------------------------------------------------|---------------------------------------------------------------|---------------|----------|----------|----------------------------------------------------|-----------|
| Phenylalanine                                                                                                                                                                | C <sub>9</sub> H <sub>11</sub> NO <sub>2</sub>                | 2.36          | 166.0861 | 165.0782 | 103.03,95.05,91.05,<br>77.04,53.03                 | [34]      |
| Tryptophan                                                                                                                                                                   | C <sub>11</sub> H <sub>12</sub> N <sub>2</sub> O <sub>2</sub> | 3.8           | 205.0968 | 204.0898 | 142.06,130.07,117.0<br>5,115.05,91.05              | [35,36]   |
| Neochlorogenic<br>acid (5-O-<br>caffeoylquinic<br>acid)                                                                                                                      | C <sub>16</sub> H <sub>18</sub> O <sub>9</sub>                | 6.16          | 353.0879 | 354.0945 | 191.06,135.04,93.03<br>,85.02                      | Standard  |
| Caffeic acid (3,4-<br>dihydroxycinna<br>mic acid)                                                                                                                            | C <sub>9</sub> H <sub>8</sub> O <sub>4</sub>                  | 8.31          | 179.0340 | 180.0415 | 134.04,108.02,89.04<br>,94.99,65.00                | Standard  |
| Caffeoylquinic<br>acid                                                                                                                                                       | C <sub>16</sub> H <sub>18</sub> O <sub>9</sub>                | 8.45          | 353.0877 | 354.0945 | 191.05,173.04,135.0<br>4,93.03,85.02               | [41]      |
| Chlorogenic acid<br>(3-O-<br>caffeoylquinic<br>acid)                                                                                                                         | C <sub>16</sub> H <sub>18</sub> O <sub>9</sub>                | 9             | 353.0877 | 354.0945 | 191.05,171.02,127.0<br>3,93.03,85.02               | Standard  |
| Quercetin-3-O-<br>glucuronide<br>(Miquelianin)                                                                                                                               | C <sub>21</sub> H <sub>18</sub> O <sub>3</sub>                | 16.07         | 477.0671 | 478.0741 | 301.03,255.02,178.9<br>9,151.00,<br>121.02,107.01  | [40]      |
| Isorhamnetin<br>glucuronide                                                                                                                                                  | C <sub>22</sub> H <sub>20</sub> O <sub>13</sub>               | 18.4          | 491.0830 | 492.0897 | 300.03,271.02,255.0<br>3,243.03,153.02             | [39]      |
| Table 1C. Peaks assignment using LC-PDA-ESI-MS/MS of metabolites detected in detected in<br>alcoholic fraction of water extract of parsley ( <i>Petroselinum sativum</i> L.) |                                                               |               |          |          |                                                    |           |
| Quinic acid                                                                                                                                                                  | C <sub>7</sub> H <sub>12</sub> O <sub>6</sub>                 | 1.12          | 191.0553 | 192.0628 | 191.06,108.02,93.03<br>,85.03                      | [33]      |
| Phenylalanine                                                                                                                                                                | C <sub>9</sub> H <sub>11</sub> NO <sub>2</sub>                | 2.36          | 166.0861 | 165.0784 | 103.03,95.05,91.05,<br>77.04,53.03                 | [34]      |
| Tryptophan                                                                                                                                                                   | C <sub>11</sub> H <sub>12</sub> N <sub>2</sub> O <sub>2</sub> | 3.8           | 205.0969 | 204.0893 | 142.06,130.07,117.0<br>5,115.05,91.05              | [35,36]   |
| Glucosyloxy<br>benzoic acid                                                                                                                                                  | C <sub>13</sub> H <sub>16</sub> O <sub>8</sub>                | 6.27          | 299.0771 | 300.0839 | 137.02,93.03,65.04                                 | Tentative |
| 2- isopropylmalic<br>acid                                                                                                                                                    | C <sub>7</sub> H <sub>12</sub> O <sub>5</sub>                 | 6.5           | 175.0603 | 176.0679 | 175.06,115.03,85.06                                | [37]      |
| 4-O-beta-D-<br>Glucosyl-4-<br>coumaric acid                                                                                                                                  | C <sub>15</sub> H <sub>18</sub> O <sub>8</sub>                | 8.97<br>11.56 | 325.0929 | 326.0996 | 119.04,101.03,<br>117.03                           | Tentative |
| Apiin                                                                                                                                                                        | C <sub>26</sub> H <sub>28</sub> O <sub>14</sub>               | 16.74         | 563.1402 | 564.1473 | 565.14,563.14,269.0<br>4                           | [42–44]   |
| Apigenin-7-<br>glucoside<br>(apigetrin,<br>cosmosiin)                                                                                                                        | C <sub>21</sub> H <sub>20</sub> O <sub>10</sub>               | 16.99         | 431.0982 | 432.1051 | 431.19, 385.18,<br>268.03,240.04,<br>151.00,107.01 | [45]      |

|                                                                                                                                                                  |                                                               |       |          |          |                                           |           |
|------------------------------------------------------------------------------------------------------------------------------------------------------------------|---------------------------------------------------------------|-------|----------|----------|-------------------------------------------|-----------|
| Chrysoeriol 7-O-apiosylglucoside                                                                                                                                 | C <sub>27</sub> H <sub>30</sub> O <sub>15</sub>               | 17.2  | 593.1515 | 594.1579 | 299.05,284.03,255.02                      | [46]      |
| Chrysoeriol glucoside                                                                                                                                            | C <sub>22</sub> H <sub>22</sub> O <sub>11</sub>               | 17.58 | 461.1090 | 462.1156 | 255.02,283.02,297.04,269.04               | [46]      |
| Apigenin                                                                                                                                                         | C <sub>15</sub> H <sub>10</sub> O <sub>5</sub>                | 25.3  | 269.0454 | 270.0522 | 121.02,117.03,107.01,65.00                | Standard  |
| Chrysoeriol                                                                                                                                                      | C <sub>16</sub> H <sub>12</sub> O <sub>6</sub>                | 25.86 | 299.0560 | 300.0628 | 227.03,183.04,199.03,256.03,211.03        | [47]      |
| Table 1D. Peaks assignment using LC-PDA-ESI-MS/MS of metabolites detected in detected in alcoholic fraction of water extract of caraway ( <i>Carum carvi</i> L.) |                                                               |       |          |          |                                           |           |
| Quinic acid                                                                                                                                                      | C <sub>7</sub> H <sub>12</sub> O <sub>6</sub>                 | 1.12  | 191.0553 | 192.0628 | 191.06,108.02,93.03,85.03                 | [33]      |
| Phenylalanine                                                                                                                                                    | C <sub>9</sub> H <sub>11</sub> NO <sub>2</sub>                | 2.29  | 166.0860 | 165.0784 | 103.03,95.05,91.05,77.04,53.03            | [34]      |
| Tryptophan                                                                                                                                                       | C <sub>11</sub> H <sub>12</sub> N <sub>2</sub> O <sub>2</sub> | 3.77  | 205.0968 | 204.0893 | 142.06,130.07,117.05,115.05,91.05         | [35,36]   |
| Neochlorogenic acid (5-O-caffeoylquinic acid)                                                                                                                    | C <sub>16</sub> H <sub>18</sub> O <sub>9</sub>                | 6.18  | 353.0878 | 354.0945 | 191.06,135.04,93.03,85.02                 | Standard  |
| Caffeoylquinic acid                                                                                                                                              | C <sub>16</sub> H <sub>18</sub> O <sub>9</sub>                | 8.5   | 353.0877 | 354.0945 | 191.05,85.02,93.03                        | [41,48]   |
| Chlorogenic acid (3-O-caffeoylquinic acid)                                                                                                                       | C <sub>16</sub> H <sub>18</sub> O <sub>9</sub>                | 9.0   | 353.0877 | 354.0945 | 191.06,171.02,127.03,93.03,85.02          | Standard  |
| Feruloyl quinic acid                                                                                                                                             | C <sub>17</sub> H <sub>20</sub> O <sub>9</sub>                | 12.55 | 367.1035 | 368.1101 | 93.03,134.03,191.05                       | [41]      |
| N2-Malonyl-tryptophan                                                                                                                                            | C <sub>14</sub> H <sub>14</sub> N <sub>2</sub> O <sub>5</sub> | 13.72 | 291.0969 | 290.0897 | 142.07,130.06,115.05                      | [49]      |
| Quercetin hexoside                                                                                                                                               | C <sub>21</sub> H <sub>20</sub> O <sub>12</sub>               | 14.98 | 463.0885 | 464.0949 | 300.02,271.02,255.02,243.02,151.00        | [50]      |
| Isoquercitrin                                                                                                                                                    | C <sub>21</sub> H <sub>20</sub> O <sub>12</sub>               | 15.27 | 463.0882 | 464.0949 | 300.02,271.02,255.02,243.02,151.00        | Standard  |
| Quercetin-3-O-glucuronide (Miquelianin)                                                                                                                          | C <sub>21</sub> H <sub>18</sub> O <sub>13</sub>               | 16.08 | 477.0673 | 478.0741 | 301.03,255.02,178.99,151.00,121.02,107.01 | [40]      |
| Kämpferol hexoside                                                                                                                                               | C <sub>21</sub> H <sub>20</sub> O <sub>11</sub>               | 16.5  | 447.0930 | 448.1000 | 284.03,255.02,227.02                      | [40,41]   |
| Quercetin-O-malonyl glucoside                                                                                                                                    | C <sub>24</sub> H <sub>22</sub> O <sub>15</sub>               | 16.98 | 549.0881 | 550.0953 | 549.08,505.09,300.02,271.02,255.02,151.00 | Tentative |
| Dicaffeoylquinic acid                                                                                                                                            | C <sub>25</sub> H <sub>24</sub> O <sub>12</sub>               | 16.98 | 515.1190 | 516.1262 | 191.05,179.02,173.04,135.04               | [51]      |

|                                                                                                                                                                        |                                                               |       |          |           |                                                   |           |
|------------------------------------------------------------------------------------------------------------------------------------------------------------------------|---------------------------------------------------------------|-------|----------|-----------|---------------------------------------------------|-----------|
| Quercetin-O-malonyl glucoside                                                                                                                                          | C <sub>24</sub> H <sub>22</sub> O <sub>15</sub>               | 17.18 | 549.0881 | 550.0952  | 549.08,505.09,300.0<br>2,271.02,255.02,<br>151.00 | Tentative |
| Kämpferol hexoside                                                                                                                                                     | C <sub>21</sub> H <sub>20</sub> O <sub>11</sub>               | 17.18 | 447.0930 | 448.1000  | 284.03,255.02,227.0<br>2                          | [40,41]   |
| Dicaffeoylquinic acid                                                                                                                                                  | C <sub>25</sub> H <sub>24</sub> O <sub>12</sub>               | 17.98 | 515.1190 | 516.1262  | 191.05,179.02,173.0<br>4,135.04                   | [51]      |
| Dicaffeoylquinic acid                                                                                                                                                  | C <sub>25</sub> H <sub>24</sub> O <sub>12</sub>               | 18.95 | 515.1190 | 516.1262  | 191.05,179.02,173.0<br>4,135.04                   | [51]      |
| Kaempferol O-malonyl-glucoside                                                                                                                                         | C <sub>24</sub> H <sub>22</sub> O <sub>14</sub>               | 19.2  | 533.0932 | 534.1004  | 533.12,489.10,255.0<br>2,227.03,284.03            | Tentative |
| 6-Hydroxyluteolin 7-caffeoylglucoside                                                                                                                                  | C <sub>30</sub> H <sub>26</sub> O <sub>15</sub>               | 19.55 | 625.1196 | 626.1266  | 300.02,151.00,271.0<br>2,255.02                   | Tentative |
| Kämpferolcaffeoyl glucoside                                                                                                                                            | C <sub>30</sub> H <sub>26</sub> O <sub>14</sub>               | 20.84 | 609.1253 | 610.1317  | 285.04,179.03,161.0<br>2,135.04                   | Tentative |
| Table 1E. Peaks assignment using LC-PDA-ESI-MS/MS of metabolites detected in detected in alcoholic fraction of water extract of greater ammi ( <i>Ammi majus</i> L.)   |                                                               |       |          |           |                                                   |           |
| Quinic acid                                                                                                                                                            | C <sub>7</sub> H <sub>12</sub> O <sub>6</sub>                 | 1.11  | 191.0550 | 192.0625  | 191.06,108.02,93.03<br>,85.03                     | [33]      |
| Phenylalanine                                                                                                                                                          | C <sub>9</sub> H <sub>11</sub> NO <sub>2</sub>                | 2.31  | 166.0860 | 165.0782  | 103.03,95.05,91.05,<br>77.04,53.03                | [34]      |
| Tryptophan                                                                                                                                                             | C <sub>11</sub> H <sub>12</sub> N <sub>2</sub> O <sub>2</sub> | 3.76  | 205.0968 | 204.08988 | 142.06,130.07,117.0<br>5,115.05,91.05             | [35,36]   |
| Coumaroylquinic acid                                                                                                                                                   | C <sub>16</sub> H <sub>18</sub> O <sub>8</sub>                | 12.8a | 337.0996 | 338.0996  | 385.02,127.03,191.0<br>5,119.04,93.0              | [41]      |
| Kämpferol hexoside                                                                                                                                                     | C <sub>33</sub> H <sub>40</sub> O <sub>20</sub>               | 12.8b | 755.2033 | 756.2107  | 255.02,227.03,284.0<br>3                          | [40,41]   |
| Isorhamnetin-rutinoside-glucoside                                                                                                                                      | C <sub>34</sub> H <sub>42</sub> O <sub>21</sub>               | 12.38 | 785.2161 | 786.2213  | 314.04,299.02,271.0<br>2                          | Tentative |
| unknown                                                                                                                                                                | C <sub>20</sub> H <sub>24</sub> O <sub>10</sub>               | 13.68 | 423.1298 | 424.1364  | 243.06,215.07,187.0<br>5,59.01                    | -         |
| Sinapoyl quinic acid                                                                                                                                                   | C <sub>18</sub> H <sub>22</sub> O <sub>10</sub>               | 14.62 | 397.1138 | 398.1207  | 202.02,176.04,161.0<br>2                          | Tentative |
| Table 1F. Peaks assignment using LC-PDA-ESI-MS/MS of metabolites detected in detected in alcoholic fraction of water extract of fennel ( <i>Foeniculum vulgare</i> L.) |                                                               |       |          |           |                                                   |           |
| Quinic acid                                                                                                                                                            | C <sub>7</sub> H <sub>12</sub> O <sub>6</sub>                 | 1.12  | 191.0553 | 192.0625  | 191.06,108.02,93.03<br>,85.03                     | [33]      |
| Phenylalanine                                                                                                                                                          | C <sub>9</sub> H <sub>11</sub> NO <sub>2</sub>                | 2.36  | 166.0860 | 165.0782  | 103.03,95.05,91.05,<br>77.04,53.03                | [34]      |

|                                                                                                                                                                         |                                                               |       |          |           |                                                   |           |
|-------------------------------------------------------------------------------------------------------------------------------------------------------------------------|---------------------------------------------------------------|-------|----------|-----------|---------------------------------------------------|-----------|
| Tryptophan                                                                                                                                                              | C <sub>11</sub> H <sub>12</sub> N <sub>2</sub> O <sub>2</sub> | 3.8   | 205.0968 | 204.0898  | 142.06,130.07,117.0<br>5,115.05,91.05             | [35,36]   |
| Neochlorogenic<br>acid (5-O-<br>caffeoylquinic<br>acid)                                                                                                                 | C <sub>16</sub> H <sub>18</sub> O <sub>9</sub>                | 6.16  | 353.0878 | 354.0953  | 191.06,135.04,93.03<br>,85.02                     | Standard  |
| Coumaroyl<br>hexoside                                                                                                                                                   | C <sub>15</sub> H <sub>18</sub> O <sub>8</sub>                | 7.31  | 325.0927 | 326.0996  | 163.03,119.04,93.03                               | Tentative |
| Caffeoylquinic<br>acid                                                                                                                                                  | C <sub>16</sub> H <sub>18</sub> O <sub>9</sub>                | 8.45  | 353.0878 | 354.0953  | 191.05,173.04,135.0<br>4,93.03,85.02              | [41,48]   |
| Chlorogenic acid<br>(3-O-<br>caffeoylquinic<br>acid)                                                                                                                    | C <sub>16</sub> H <sub>18</sub> O <sub>9</sub>                | 9.01  | 353.0877 | 354.0953  | 191.05,171.02,127.0<br>3,93.03,85.02              | Standard  |
| Coumaroylquinic<br>acid                                                                                                                                                 | C <sub>16</sub> H <sub>18</sub> O <sub>8</sub>                | 11.56 | 337.0924 | 338.0996  | 385.02,191.05,127.0<br>3,119.04,93.0              | [41]      |
| Feruloylquinic<br>acid                                                                                                                                                  | C <sub>17</sub> H <sub>20</sub> O <sub>9</sub>                | 11.58 | 367.1034 | 368.1101  | 191.05,134.03,93.03<br>, 85.02                    | [41]      |
| Dicafeoylquinic<br>acid                                                                                                                                                 | C <sub>25</sub> H <sub>24</sub> O <sub>12</sub>               | 12.11 | 515.1196 | 516.1262  | 191.05,179.02,173.0<br>4,135.04                   | [51]      |
| Feruloyl quinic<br>acid                                                                                                                                                 | C <sub>17</sub> H <sub>20</sub> O <sub>9</sub>                | 12.56 | 367.1034 | 368.1101  | 191.05,134.03,93.03<br>, 85.02                    | [41]      |
| Quercetin-3-O-<br>glucuronide<br>(Miquelianin)                                                                                                                          | C <sub>21</sub> H <sub>18</sub> O <sub>13</sub>               | 16.05 | 477.0671 | 478.07401 | 301.03,255.02,178.9<br>9,151.00,<br>121.02,107.01 | [40]      |
| Dicafeoylquinic<br>acid                                                                                                                                                 | C <sub>25</sub> H <sub>24</sub> O <sub>12</sub>               | 17.03 | 515.1194 | 516.1262  | 191.05,179.02,173.0<br>4,135.04                   | [51]      |
| Kämpferol<br>glucuronide                                                                                                                                                | C <sub>21</sub> H <sub>18</sub> O <sub>12</sub>               | 17.85 | 461.0726 | 462.0792  | 285.04,229.05,185.0<br>6,85.                      | [52]      |
| Dicafeoylquinic<br>acid                                                                                                                                                 | C <sub>25</sub> H <sub>24</sub> O <sub>12</sub>               | 18.20 | 515.1194 | 516.1262  | 191.05,179.02,173.0<br>4,135.04                   | [51]      |
| Kämpferol<br>rhamnoside                                                                                                                                                 | C <sub>21</sub> H <sub>20</sub> O <sub>10</sub>               | 19.74 | 431.0981 | 432.1051  | 255.02,227.03                                     | Tentative |
| Irbic acid                                                                                                                                                              | C <sub>28</sub> H <sub>26</sub> O <sub>15</sub>               | 20.12 | 601.1200 | 602.1266  | 233.066,191.05,173.<br>04,135.04,59.01            | Tentative |
| Table 1G. Peaks assignment using LC-PDA-ESI-MS/MS of metabolites detected in detected in<br>alcoholic fraction of water extract of anise ( <i>Pimpinella anisum</i> L.) |                                                               |       |          |           |                                                   |           |
| Quinic acid                                                                                                                                                             | C <sub>7</sub> H <sub>12</sub> O <sub>6</sub>                 | 1.12  | 191.0553 | 192.0628  | 191.06,108.02,93.03<br>,85.03                     | [33]      |
| Phenylalanine                                                                                                                                                           | C <sub>9</sub> H <sub>11</sub> NO <sub>2</sub>                | 2.36  | 166.0860 | 165.0784  | 103.03,95.05,91.05,<br>77.04,53.03                | [34]      |
| Tryptophan                                                                                                                                                              | C <sub>11</sub> H <sub>12</sub> N <sub>2</sub> O <sub>2</sub> | 3.8   | 205.0968 | 204.08988 | 142.06,130.07,117.0<br>5,115.05,91.05             | [35,36]   |
| Neochlorogenic<br>acid (5-O-                                                                                                                                            | C <sub>16</sub> H <sub>18</sub> O <sub>9</sub>                | 6.16  | 353.0875 | 354.0953  | 191.06,135.04,93.03<br>,85.02                     | Standard  |



|                                                                                                                                                                      |                                                               |       |          |           |                                           |            |
|----------------------------------------------------------------------------------------------------------------------------------------------------------------------|---------------------------------------------------------------|-------|----------|-----------|-------------------------------------------|------------|
| caffeoylquinic acid)                                                                                                                                                 |                                                               |       |          |           |                                           |            |
| Caffeoylquinic acid                                                                                                                                                  | C <sub>16</sub> H <sub>18</sub> O <sub>9</sub>                | 8.45  | 353.0875 | 354.0953  | 191.05,173.04,135.04,93.03,85.02          | [41,48]    |
| Chlorogenic acid (3-O-caffeoylquinic acid)                                                                                                                           | C <sub>16</sub> H <sub>18</sub> O <sub>9</sub>                | 9.01  | 353.0874 | 354.0953  | 191.05,171.02,127.03,93.03,85.02          | Standard   |
| Coumaroylquinic acid                                                                                                                                                 | C <sub>16</sub> H <sub>18</sub> O <sub>8</sub>                | 11.56 | 337.0927 | 338.0996  | 385.02,191.05,127.03,119.04,93.0          | [41]       |
| Feruloyl quinic acid                                                                                                                                                 | C <sub>17</sub> H <sub>20</sub> O <sub>9</sub>                | 11.58 | 367.1031 | 368.11047 | 191.05,134.03,93.03,85.02                 | [41]       |
| Luteolin-6-glucoside (Isoorientin)                                                                                                                                   | C <sub>21</sub> H <sub>20</sub> O <sub>11</sub>               | 12.10 | 447.0929 | 448.1002  | 327.05,311.05,299.05,285.04,175.03,133.02 | [45,53,54] |
| Coumaroylquinic acid                                                                                                                                                 | C <sub>16</sub> H <sub>18</sub> O <sub>8</sub>                | 12.10 | 337.0926 | 338.0996  | 385.02,191.05,127.03,119.04,93.0          | [41]       |
| Feruloylquinic acid                                                                                                                                                  | C <sub>17</sub> H <sub>20</sub> O <sub>9</sub>                | 12.54 | 367.1030 | 368.11047 | 191.05,134.03,93.03,85.02                 | [41]       |
| Apigenin-6-glucoside (Isovitexin)                                                                                                                                    | C <sub>21</sub> H <sub>20</sub> O <sub>10</sub>               | 14.29 | 431.0983 | 432.1051  | 295.06,283.06,117.03,161.02               | [45]       |
| Luteolin hexoside                                                                                                                                                    | C <sub>21</sub> H <sub>20</sub> O <sub>11</sub>               | 14.74 | 447.0932 | 448.1002  | 284.03,256.03,151.00,133.02               | Tentative  |
| Quercetin-3-O-glucuronide (Miquelianin)                                                                                                                              | C <sub>21</sub> H <sub>18</sub> O <sub>13</sub>               | 16.1  | 477.0672 | 478.0741  | 301.03,255.02,178.99,151.00,121.02,107.01 | [40]       |
| Dicaffeoyl quinic acid                                                                                                                                               | C <sub>25</sub> H <sub>24</sub> O <sub>12</sub>               | 16.96 | 515.1191 | 516.1263  | 191.05,179.02,173.04,135.04               | [51]       |
| Luteolin glucuronide                                                                                                                                                 | C <sub>21</sub> H <sub>18</sub> O <sub>12</sub>               | 17.92 | 461.0725 | 462.0792  | 285.04,257.04,229.05,185.05,85.02,71.01   | [51]       |
| Dicaffeoylquinic acid                                                                                                                                                | C <sub>25</sub> H <sub>24</sub> O <sub>12</sub>               | 17.99 | 515.1191 | 516.1262  | 191.05,179.02,173.04,135.04               | [51]       |
| Dicaffeoylquinic acid                                                                                                                                                | C <sub>25</sub> H <sub>24</sub> O <sub>12</sub>               | 18.97 | 515.1191 | 516.12638 | 191.05,179.03,173.04,135.04               | [51]       |
| Table 1H. Peaks assignment using LC-PDA-ESI-MS/MS of metabolites detected in detected in alcoholic fraction of water extract of celery ( <i>Apium graveolens</i> L.) |                                                               |       |          |           |                                           |            |
| Quinic acid                                                                                                                                                          | C <sub>7</sub> H <sub>12</sub> O <sub>6</sub>                 | 1.12  | 191.0551 | 192.0628  | 108.02,93.03,85.03                        | [33]       |
| Phenylalanine                                                                                                                                                        | C <sub>9</sub> H <sub>11</sub> NO <sub>2</sub>                | 2.31  | 166.0860 | 165.0782  | 103.03,95.05,91.05,77.04,53.03            | [34]       |
| Tryptophan                                                                                                                                                           | C <sub>11</sub> H <sub>12</sub> N <sub>2</sub> O <sub>2</sub> | 3.78  | 205.0969 | 204.0898  | 142.06,130.07,117.05,115.05,91.05         | [35,36]    |
| Neochlorogenic acid (5-O-                                                                                                                                            | C <sub>16</sub> H <sub>18</sub> O <sub>9</sub>                | 6.14  | 353.0876 | 354.0953  | 191.05,135.04,93.03,85.02                 | Standard   |

|                                                                                                                                                                   |                                                               |       |          |          |                                               |          |
|-------------------------------------------------------------------------------------------------------------------------------------------------------------------|---------------------------------------------------------------|-------|----------|----------|-----------------------------------------------|----------|
| caffeoylquinic acid)                                                                                                                                              |                                                               |       |          |          |                                               |          |
| Caffeoylquinic acid                                                                                                                                               | C <sub>16</sub> H <sub>18</sub> O <sub>9</sub>                | 8.43  | 353.0878 | 354.0953 | 191.05,173.0,135.04,93.03,85.02               | [41,48]  |
| Chlorogenic acid (3-O-caffeoylquinic acid)                                                                                                                        | C <sub>16</sub> H <sub>18</sub> O <sub>9</sub>                | 8.91  | 353.0876 | 354.0953 | 191.05,171.02,127.03,93.03,85.02              | Standard |
| Coumaroylquinic acid                                                                                                                                              | C <sub>16</sub> H <sub>18</sub> O <sub>8</sub>                | 11.54 | 337.0927 | 338.0996 | 385.02,191.05,127.03,119.04,93.0              | [41]     |
| Coumaroylquinic acid                                                                                                                                              | C <sub>16</sub> H <sub>18</sub> O <sub>8</sub>                | 12.91 | 337.0928 | 338.0996 | 385.02,191.05,127.03,119.04,93.0              | [41]     |
| Feruloylquinic acid                                                                                                                                               | C <sub>17</sub> H <sub>20</sub> O <sub>9</sub>                | 12.60 | 367.1033 | 368.1101 | 191.05,134.03,93.03,85.02                     | [41]     |
| Luteolin-7-O-apiosylglucoside                                                                                                                                     | C <sub>26</sub> H <sub>28</sub> O <sub>15</sub>               | 14.73 | 579.1350 | 580.1422 | 285.04                                        | [46,55]  |
| Apiin                                                                                                                                                             | C <sub>26</sub> H <sub>28</sub> O <sub>14</sub>               | 16.77 | 563.1400 | 564.1473 | 563.14,565.14,269.04                          | [42–44]  |
| Chrysoeriol 7-O-apiosylglucoside                                                                                                                                  | C <sub>27</sub> H <sub>30</sub> O <sub>15</sub>               | 17.28 | 593.1508 | 594.1579 | 299.05,284.03,255.02                          | [46,55]  |
| luteolin 7-malonyl-apiosyl glucoside                                                                                                                              | C <sub>29</sub> H <sub>30</sub> O <sub>18</sub>               | 18.00 | 665.1360 | 666.1426 | 621.14,489.10,327.05,285.04                   | [46,55]  |
| Apigenin-7-malonyl-apiosylglucoside                                                                                                                               | C <sub>29</sub> H <sub>30</sub> O <sub>17</sub>               | 19.20 | 649.1404 | 650.1477 | 269.05                                        | [52,55]  |
| Chrysoeriol-7-malonyl-apiosyl glucoside                                                                                                                           | C <sub>30</sub> H <sub>32</sub> O <sub>18</sub>               | 20.24 | 679.1511 | 680.1583 | 299.05,284.03                                 | [46,55]  |
| Luteolin                                                                                                                                                          | C <sub>15</sub> H <sub>10</sub> O <sub>6</sub>                | 21.93 | 285.0401 | 286.0471 | 133.02,115.01,107.01,65.00                    | Standard |
| Khellin                                                                                                                                                           | C <sub>14</sub> H <sub>12</sub> O <sub>5</sub>                | 21.93 | 261.0752 | 260.0679 | 231.02,209.00,181.01,163.00,95.01             | [56]     |
| Apigenin                                                                                                                                                          | C <sub>15</sub> H <sub>10</sub> O <sub>5</sub>                | 25.37 | 269.0452 | 270.0522 | 121.02,117.03,107.01,65.00                    | Standard |
| Chrysoeriol                                                                                                                                                       | C <sub>16</sub> H <sub>12</sub> O <sub>6</sub>                | 25.93 | 299.0552 | 300.0628 | 255.02,227.03,151.00,107.01,83.01,65.00,63.02 | [56]     |
| Table 11. Peaks assignment using LC-PDA-ESI-MS/MS of metabolites detected in detected in alcoholic fraction of water extract of visnaga ( <i>Ammi visnaga</i> L.) |                                                               |       |          |          |                                               |          |
| Quinic acid                                                                                                                                                       | C <sub>7</sub> H <sub>12</sub> O <sub>6</sub>                 | 1.12  | 191.0551 | 192.0624 | 191.06,108.02,93.03,85.03                     | [33]     |
| Phenylalanine                                                                                                                                                     | C <sub>9</sub> H <sub>11</sub> NO <sub>2</sub>                | 2.36  | 166.0860 | 165.0782 | 103.03,95.05,91.05,77.04,53.03                | [34]     |
| Tryptophan                                                                                                                                                        | C <sub>11</sub> H <sub>12</sub> N <sub>2</sub> O <sub>2</sub> | 3.8   | 205.0968 | 204.0898 | 142.06,130.07,117.05,115.05,91.05             | [35,36]  |

|                                            |                                                   |       |          |          |                                                 |           |
|--------------------------------------------|---------------------------------------------------|-------|----------|----------|-------------------------------------------------|-----------|
| Caffeoylquinic acid                        | C <sub>16</sub> H <sub>18</sub> O <sub>9</sub>    | 8.45  | 353.0874 | 354.0953 | 191.05,135.04,93.03,85.02                       | [41,48]   |
| Chlorogenic acid (3-O-caffeoylquinic acid) | C <sub>16</sub> H <sub>18</sub> O <sub>9</sub>    | 8.94  | 353.0874 | 354.0953 | 191.05,171.02,127.03,93.03,85.02                | Standard  |
| Caffeoylquinic acid                        | C <sub>16</sub> H <sub>18</sub> O <sub>9</sub>    | 9.85  | 353.0876 | 354.0953 | 191.05,135.04,93.03,85.02                       | [41,48]   |
| Coumaroylquinic acid                       | C <sub>16</sub> H <sub>18</sub> O <sub>8</sub>    | 11.50 | 337.0927 | 338.0996 | 385.02,191.05,127.03,119.04,93.0                | [41]      |
| Coumaroylquinic acid                       | C <sub>16</sub> H <sub>18</sub> O <sub>8</sub>    | 12.12 | 337.0927 | 338.0996 | 385.02,191.05,127.03,119.04,93.0                | [41]      |
| Feruloylquinic acid                        | C <sub>17</sub> H <sub>20</sub> O <sub>9</sub>    | 12.50 | 367.1035 | 368.1101 | 191.05,134.03,93.03,85.02                       | [41]      |
| Ammiol glucoside                           | C <sub>20</sub> H <sub>22</sub> O <sub>11</sub>   | 13.37 | 439.1227 | 438.1156 | 247.02,216.04,262.04,201.01,85.02               | [56]      |
| Cimifugin                                  | C <sub>16</sub> H <sub>18</sub> O <sub>6</sub>    | 14.30 | 307.1169 | 306.1097 | 259.05,221.04,233.04,177.05,59.04               | [57]      |
| Quercetin-3-hexoside                       | C <sub>21</sub> H <sub>20</sub> O <sub>12</sub>   | 15.3  | 463.0880 | 464.0949 | 271.02,255.02,300.02,243.02,151.00              | Standard  |
| Khellol                                    | C <sub>13</sub> H <sub>10</sub> O <sub>5</sub>    | 15.4  | 247.0596 | 246.0522 | 203.03,175.03,147.04,91.05                      | [56]      |
| Kämpherol rutinoside                       | C <sub>27</sub> H <sub>30</sub> O <sub>15</sub>   | 16.7  | 593.1512 | 594.1579 | 284.03,285.04,255.02,227.03,151.00              | [38,39]   |
| Rhamnetin rutinoside                       | C <sub>28</sub> H <sub>32</sub> O <sub>16</sub>   | 16.99 | 623.1615 | 624.1648 | 315.05,300.02,285.04,271.02,255.02,243.02       | Tentative |
| Rhamnetin hexoside                         | C <sub>22</sub> H <sub>22</sub> O <sub>12</sub>   | 17.6  | 477.1036 | 478.1105 | 314.04,299.01,285.04,271.02,257.04,243.02       | Tentative |
| Isorhamnetin-malonyl-glucoside             | C <sub>25</sub> H <sub>24</sub> O <sub>15</sub>   | 19.7  | 563.1024 | 564.1109 | 299.01,271.02,255.02,314.04,243.02              | Tentative |
| Khellin                                    | C <sub>14</sub> H <sub>12</sub> O <sub>5</sub>    | 21.87 | 261.0752 | 260.0679 | 231.02,209.00,181.01,163.00,95.01               | [56]      |
| Visnagine                                  | C <sub>13</sub> H <sub>10</sub> O <sub>4</sub>    | 22.16 | 231.0648 | 230.0573 | 187.03,159.04,148.01,131.04,120.02,103.05,92.02 | [56]      |
| Isorhamnetin                               | C <sub>16</sub> H <sub>12</sub> O <sub>7</sub>    | 23.70 | 315.26   | 316.26   | 299.02,287.02,269.01,243.03,213.04              | [54]      |
| Rhamnetin 3-O-sulfate                      | C <sub>16</sub> H <sub>12</sub> O <sub>10</sub> S | 28.70 | 395.0075 | 396.0145 | 271.02,243.02,165.01,121.02,97.02,65.00         | Tentative |
| Samidin                                    | C <sub>21</sub> H <sub>22</sub> O <sub>7</sub>    | 33.70 | 387.1485 | 386.1360 | n.a.                                            | Tentative |

|                                                                                                                                                                                    |                                                               |                |                      |          |                                               |           |
|------------------------------------------------------------------------------------------------------------------------------------------------------------------------------------|---------------------------------------------------------------|----------------|----------------------|----------|-----------------------------------------------|-----------|
| Visnadin                                                                                                                                                                           | C <sub>21</sub> H <sub>24</sub> O <sub>7</sub>                | 34.3           | 389.1574             | 388.1516 | 227.06,175.03,128.0<br>6,57.07                | Tentative |
| Table 1K. Peaks assignment using LC-PDA-ESI-MS/MS of metabolites detected in detected in alcoholic fraction of water extract of coriander ( <i>Coriandrum sativum</i> L.), Germany |                                                               |                |                      |          |                                               |           |
| Quinic acid                                                                                                                                                                        | C <sub>7</sub> H <sub>12</sub> O <sub>6</sub>                 | 1.11           | 191.0552             | 192.0624 | 191.06,108.02,93.03,85.03                     | [33]      |
| Phenylalanine                                                                                                                                                                      | C <sub>9</sub> H <sub>11</sub> NO <sub>2</sub>                | 2.31           | 166.0860             | 165.0782 | 103.03,95.05,91.05,77.04,53.0<br>3            | [34]      |
| Tryptophan                                                                                                                                                                         | C <sub>11</sub> H <sub>12</sub> N <sub>2</sub> O <sub>2</sub> | 3.76           | 205.0962             | 204.0898 | 142.06,130.07,117.05,115.05,<br>91.05         | [35,36]   |
| 2- isopropylmalic acid                                                                                                                                                             | C <sub>7</sub> H <sub>12</sub> O <sub>5</sub>                 | 6.5            | 175.0602             | 176.0675 | 175.06,115.03,85.06                           | [37]      |
| Coumaroyl hexoside                                                                                                                                                                 | C <sub>15</sub> H <sub>18</sub> O <sub>8</sub>                | 7.31<br>11.56  | 325.0926             | 326.0996 | 119.04,93.03<br>119.04,101.03                 | Tentative |
| Apiin                                                                                                                                                                              | C <sub>26</sub> H <sub>28</sub> O <sub>14</sub>               | 16.71          | 563.1399             | 564.1473 | 565.14,563.14,269.04                          | [42–44]   |
| Chrysoeriol- 7-O-<br>apiosylglucoside                                                                                                                                              | C <sub>27</sub> H <sub>30</sub> O <sub>15</sub>               | 17.2<br>17.58  | 593.1508             | 594.1579 | 299.05,284.03<br>299.05,284.03                | [46,55]   |
| Malonylapiin                                                                                                                                                                       | C <sub>29</sub> H <sub>30</sub> O <sub>17</sub>               | 18.74<br>19.93 | 649.1413<br>649.1416 | 650.1477 | 269.04<br>269.04                              | [43,46]   |
| Table 1L. Peaks assignment using LC-PDA-ESI-MS/MS of metabolites detected in hydroalcohol extract of dill ( <i>Anethum graveolens</i> L.) Germany                                  |                                                               |                |                      |          |                                               |           |
| Quinic acid                                                                                                                                                                        | C <sub>7</sub> H <sub>12</sub> O <sub>6</sub>                 | 1.12           | 191.0552             | 192.0624 | 191.06,108.02,93.03,85.03                     | [33]      |
| Phenylalanine                                                                                                                                                                      | C <sub>9</sub> H <sub>11</sub> NO <sub>2</sub>                | 2.36           | 166.0860             | 165.0782 | 103.03,95.05,91.05,77.04,53.0<br>3            | [34]      |
| Tryptophan                                                                                                                                                                         | C <sub>11</sub> H <sub>12</sub> N <sub>2</sub> O <sub>2</sub> | 3.8            | 205.0969             | 204.0898 | 142.06,130.07,117.05,115.05,<br>91.05         | [35,36]   |
| Neochlorogenic acid (5-O-<br>caffeoylquinic acid)                                                                                                                                  | C <sub>16</sub> H <sub>18</sub> O <sub>9</sub>                | 6.16           | 353.0878             | 354.0953 | 191.06,135.04,93.03,85.02                     | Standard  |
| Caffeic acid (3,4-<br>dihydroxycinnamic acid)                                                                                                                                      | C <sub>9</sub> H <sub>8</sub> O <sub>4</sub>                  | 8.31           | 179.0340             | 180.0417 | 134.04,108.02,89.04,94.99,65.<br>00           | Standard  |
| Caffeoylquinic acid                                                                                                                                                                | C <sub>16</sub> H <sub>18</sub> O <sub>9</sub>                | 8.45           | 353.0875             | 354.0953 | 191.05,173.04,135.04,93.03,8<br>5.02          | [41,48]   |
| Chlorogenic acid (3-O-<br>caffeoylquinic acid)                                                                                                                                     | C <sub>16</sub> H <sub>18</sub> O <sub>9</sub>                | 9              | 353.0877             | 354.0953 | 191.05,171.02,127.03,93.03,8<br>5.02          | Standard  |
| Quercetin-3-O-<br>glucuronide (Miquelianin)                                                                                                                                        | C <sub>21</sub> H <sub>18</sub> O <sub>13</sub>               | 16.07          | 477.0670             | 478.0741 | 301.03,255.02,178.99,151.00,<br>121.02,107.01 | [40]      |
| Kämpferol glucuronide                                                                                                                                                              | C <sub>21</sub> H <sub>18</sub> O <sub>12</sub>               | 17.83          | 461.0724             | 462.0792 | 285.04,229.05,187.03,257.04                   | [52]      |

|                                                                                                                                                                                   |                                                               |       |          |          |                                            |           |
|-----------------------------------------------------------------------------------------------------------------------------------------------------------------------------------|---------------------------------------------------------------|-------|----------|----------|--------------------------------------------|-----------|
| Isorhamnetin glucuronide                                                                                                                                                          | C <sub>22</sub> H <sub>20</sub> O <sub>13</sub>               | 18.4  | 491.0829 | 492.0898 | 300.03,271.02,255.03,243.03,153.02         | [39]      |
| Table 1M. Peaks assignment using LC-PDA-ESI-MS/MS of metabolites detected in detected in alcoholic fraction of water extract of parsley ( <i>Petroselinum sativum</i> L.) Germany |                                                               |       |          |          |                                            |           |
| Quinic acid                                                                                                                                                                       | C <sub>7</sub> H <sub>12</sub> O <sub>6</sub>                 | 1.12  | 191.0553 | 192.0624 | 191.06,108.02,93.03,85.03                  | [33]      |
| Phenylalanine                                                                                                                                                                     | C <sub>9</sub> H <sub>11</sub> NO <sub>2</sub>                | 2.36  | 166.0860 | 165.0782 | 95.05,103.05,77.04,91.05,53.03             | [34]      |
| Tryptophan                                                                                                                                                                        | C <sub>11</sub> H <sub>12</sub> N <sub>2</sub> O <sub>2</sub> | 3.8   | 205.0968 | 204.0898 | 142.06,130.07,117.05,115.05,91.05          | [35,36]   |
| Glucosyloxybenzoic acid                                                                                                                                                           | C <sub>13</sub> H <sub>16</sub> O <sub>8</sub>                | 6.27  | 299.0772 | 300.0839 | 93.03,137.02                               | Tentative |
| 2- isopropylmalic acid                                                                                                                                                            | C <sub>7</sub> H <sub>12</sub> O <sub>5</sub>                 | 6.5   | 175.0600 | 176.0679 | 175.06,115.03,85.06                        | [37]      |
| 4-O-beta-D-Glucosyl-4-coumaric acid                                                                                                                                               | C <sub>15</sub> H <sub>18</sub> O <sub>8</sub>                | 11.56 | 325.0927 | 326.0996 | 119.04,101.038, 91.05                      | Tentative |
| Apiin                                                                                                                                                                             | C <sub>26</sub> H <sub>28</sub> O <sub>14</sub>               | 16.74 | 563.1406 | 564.1473 | 565.14,563.14,269.04                       | [42–44]   |
| Apigenin 7-glucoside (apigetrin, cosmosiin)                                                                                                                                       | C <sub>21</sub> H <sub>20</sub> O <sub>10</sub>               | 16.99 | 431.0982 | 432.1051 | 431.19,385.18, 268.03,240.04,151.00,107.01 | [45]      |
| Chrysoeriol 7-O-apiosylglucoside                                                                                                                                                  | C <sub>27</sub> H <sub>30</sub> O <sub>15</sub>               | 17.2  | 593.1513 | 594.1579 | 299.05,284.03,255.02                       | [46,55]   |
| Chrysoeriol 7-O-apiosylglucoside                                                                                                                                                  | C <sub>27</sub> H <sub>30</sub> O <sub>15</sub>               | 17.6  | 593.1513 | 594.1579 | 299.05,284.03                              | [46,55]   |
| Apigenin-O-malonyl-apiosylglucoside                                                                                                                                               | C <sub>29</sub> H <sub>30</sub> O <sub>17</sub>               | 18.78 | 649.1416 | 650.1477 | 269.04                                     | [46,55]   |
| Acetylapiin                                                                                                                                                                       | C <sub>28</sub> H <sub>30</sub> O <sub>15</sub>               | 19.18 | 605.1513 | 606.1579 | 545.12,269.04                              | [58,59]   |
| Acetylapiin                                                                                                                                                                       | C <sub>28</sub> H <sub>30</sub> O <sub>15</sub>               | 19.55 | 605.1513 | 606.1579 | 545.12,269.04                              | [58,59]   |
| Malonylapiin                                                                                                                                                                      | C <sub>29</sub> H <sub>30</sub> O <sub>17</sub>               | 19.98 | 649.1406 | 650.1477 | 269.04                                     | [46,55]   |
| Chrysoeriol-O-malonyl-apiosyl glucoside                                                                                                                                           | C <sub>30</sub> H <sub>32</sub> O <sub>18</sub>               | 20.30 | 679.1514 | 680.1583 | 299.05,284.03                              | [46,55]   |
| Chrysoeriol-O-malonyl-apiosyl glucoside                                                                                                                                           | C <sub>30</sub> H <sub>32</sub> O <sub>18</sub>               | 20.50 | 679.1516 | 680.1583 | 299.05,284.03                              | [46,55]   |
| Apigenin                                                                                                                                                                          | C <sub>15</sub> H <sub>10</sub> O <sub>5</sub>                | 25.3  | 269.0454 | 270.0522 | 121.02,117.03,107.01,65.00                 | Standard  |
| Chrysoeriol                                                                                                                                                                       | C <sub>16</sub> H <sub>12</sub> O <sub>6</sub>                | 25.86 | 299.0560 | 300.0628 | 227.03,133.02,107.01,83.01,65.00,63.02     | [47]      |

## Egyptian cultivar PLS-R data

Table S1. The partial least squares regression model parameters used for prediction of Egyptian cultivar LC-PDA-ESI-MS/MS data

| Antioxidant Activity      | Data Type | Slope      | Offset    | RMSE      | R <sup>2</sup> |
|---------------------------|-----------|------------|-----------|-----------|----------------|
| PLS non transformed data  |           |            |           |           |                |
| DPPH                      | Cal.      | 0.9968671  | 7.3579707 | 329.17633 | 0.9968677      |
|                           | Val.      | 0.0258937  | 384.28726 | 6061.5322 | 0.1607961      |
| FRAP                      | Cal.      | 0.987534   | 2.5186396 | 10.49666  | 0.9875342      |
|                           | Val.      | 0.3256635  | 144.72205 | 100.90437 | 0.898071       |
| PLS log (area) & ln(area) |           |            |           |           |                |
| ABTS                      | Cal.      | 0.8009732  | 13.528515 | 9.0139084 | 0.9009734      |
|                           | Val.      | 0.2687734  | 48.832386 | 17.27236  | 0.4225917      |
| CUPRAC                    | Cal.      | 0.9688284  | 1.9007552 | 4.8298798 | 0.9688284      |
|                           | Val.      | 0.3514741  | 43.346481 | 22.052135 | 0.4865686      |
| PLS (VIP area)            |           |            |           |           |                |
| TFC                       | Cal.      | 0.7254292  | 5.66467   | 3.5678627 | 0.7254292      |
|                           | Val.      | 0.0252936  | 20.475248 | 7.5322194 | 0.033106       |
| ABTS                      | Cal.      | 0.7211936  | 18.951406 | 10.668641 | 0.7211934      |
|                           | Val.      | 0.39688611 | 41.069626 | 17.802046 | 0.3866343      |

RMSE: Root mean squared error, R<sup>2</sup>: Determination, Cal.:Calibration and Val.:Validation

Table S2. The partial least squares regression model parameters used for prediction of Egyptian cultivar NIR data

| PLS   |           |       |        |      |                |
|-------|-----------|-------|--------|------|----------------|
| Assay | Data type | Slope | Offset | RMSE | R <sup>2</sup> |

|      |      |           |           |           |           |
|------|------|-----------|-----------|-----------|-----------|
| FRAP | Cal. | 0.7811501 | 49.495564 | 57.375729 | 0.7811473 |
|      | Val. | 0.4346163 | 95.622643 | 118.91148 | 0.2572579 |

RMSE: Root mean squared error, R<sup>2</sup>: Determination, Cal.:Calibration and Val.:Validation

## Egyptian and German cultivar PLS-R data

Table S3. The partial least squares regression model parameters used for prediction of Egyptian cultivar and German cultivar LC-PDA-ESI-MS/MS data

| Antioxidant Activity      | Data Type | Slope     | Offset    | RMSE      | R <sup>2</sup> |
|---------------------------|-----------|-----------|-----------|-----------|----------------|
| PLS non transformed data  |           |           |           |           |                |
| TFC                       | Cal.      | 0.9552968 | 0.6474656 | 0.5895864 | 0.9552968      |
|                           | Val.      | 0.2064124 | 11.209846 | 2.4045751 | 0.4836345      |
| ABTS                      | Cal.      | 0.9344023 | 4.5942454 | 4.3898349 | 0.9344023      |
|                           | Val.      | -0.274772 | 88.512421 | 22.348585 | NA             |
| FRAP                      | Cal.      | 0.9931057 | 1.6520962 | 11.653375 | 0.9931061      |
|                           | Val.      | 0.340399  | 139.38246 | 98.759811 | 0.6561559      |
| CUPRAC                    | Cal.      | 0.9820264 | 0.5360399 | 2.2024305 | 0.9820263      |
|                           | Val.      | 0.0796946 | 30.746254 | 18.649527 | 0.105035       |
| PLS log (area) & ln(area) |           |           |           |           |                |
| TFC                       | Cal.      | 0.8302361 | 2.4588001 | 1.1489502 | 0.830236       |
|                           | Val.      | 0.283339  | 9.990922  | 2.625684  | 0.3843039      |
| ABTS                      | Cal.      | 0.9985683 | 0.1002732 | 0.6485265 | 0.9985683      |
|                           | Val.      | 0.1225686 | 58.52393  | 16.081888 | 0.3886307      |
| FRAP                      | Cal.      | 0.9604625 | 9.4745331 | 27.907633 | 0.9604625      |
|                           | Val.      | 0.6868727 | 74.804642 | 56.028076 | 0.8893344      |
| CUPRAC                    | Cal.      | 0.9968458 | 0.0940693 | 0.9225953 | 0.996846       |
|                           | Val.      | 0.0032594 | 26.323204 | 17.699593 | 0.1938851      |
| PLS 1/ area               |           |           |           |           |                |
| TFC                       | Cal.      | 0.9825553 | 0.2526628 | 0.3683073 | 0.9825553      |
|                           | Val.      | 0.2703978 | 9.8083448 | 2.410485  | 0.481093       |
| ABTS                      | Cal.      | 0.879761  | 8.4211407 | 5.943294  | 0.8797607      |
|                           | Val.      | 0.5568687 | 113.27921 | 27.930979 | NA             |
| FRAP                      | Cal.      | 0.9696605 | 7.2703729 | 24.446911 | 0.9696603      |
|                           | Val.      | 0.6490799 | 77.260376 | 111.81931 | 0.5592069      |

|                                                                                                       |      |           |             |           |           |
|-------------------------------------------------------------------------------------------------------|------|-----------|-------------|-----------|-----------|
| CUPRAC                                                                                                | Cal. | 1.000001  | -3.0709e-06 | 0.0055413 | 0.9999999 |
|                                                                                                       | Val. | 0.0451413 | 29.214575   | 17.990232 | 0.1671938 |
| PLS VIP                                                                                               |      |           |             |           |           |
| TFC                                                                                                   | Cal. | 0.9040673 | 1.3894551   | 0.8636983 | 0.9040672 |
|                                                                                                       | Val. | 0.6156319 | 5.2804108   | 1.969704  | 0.6535166 |
| ABTS                                                                                                  | Cal. | 0.9893306 | 0.7472522   | 1.7704282 | 0.9893304 |
|                                                                                                       | Val. | 0.78108   | 21.446133   | 12.265608 | 0.644362  |
| FRAP                                                                                                  | Cal. | 0.977436  | 5.4070973   | 21.082716 | 0.977436  |
|                                                                                                       | Val. | 0.7961144 | 47.764694   | 78.653099 | 0.7819115 |
| CUPRAC                                                                                                | Cal. | 0.914126  | 2.5610783   | 4.8140893 | 0.9141261 |
|                                                                                                       | Val. | 1.1293789 | 0.6317368   | 16.306091 | 0.31582   |
| PLS log&ln VIP area                                                                                   |      |           |             |           |           |
| TFC                                                                                                   | Cal. | 0.9448361 | 0.7989734   | 0.6549456 | 0.9448362 |
|                                                                                                       | Val. | 0.6495724 | 4.4776964   | 2.2343636 | 0.5541505 |
| ABTS                                                                                                  | Cal. | 1         | 4.0615e-06  | 0.0015732 | 1         |
|                                                                                                       | Val. | 0.7419788 | 14.972853   | 6.6369767 | 0.8958714 |
| FRAP                                                                                                  | Cal. | 0.9496821 | 12.057903   | 31.483269 | 0.949682  |
|                                                                                                       | Val. | 0.8639253 | 45.149986   | 73.751381 | 0.8082474 |
| CUPRAC                                                                                                | Cal. | 0.9999314 | 0.0020536   | 0.1362393 | 0.9999313 |
|                                                                                                       | Val. | 0.7412386 | 3.5053377   | 9.9406719 | 0.745726  |
| PLS VIP 1/area                                                                                        |      |           |             |           |           |
| TFC                                                                                                   | Cal. | 0.9931299 | 0.0995037   | 0.231132  | 0.9931299 |
|                                                                                                       | Val. | 1.1727785 | -0.2092972  | 1.2270774 | 0.8655302 |
| ABTS                                                                                                  | Cal. | 0.9279797 | 5.0440607   | 4.5997109 | 0.92798   |
|                                                                                                       | Val. | 0.9625494 | -0.0465297  | 10.991563 | 0.7144064 |
| FRAP                                                                                                  | Cal. | 0.9998937 | 0.0254608   | 1.447054  | 0.9998937 |
|                                                                                                       | Val. | 0.7805497 | 29.442457   | 59.561966 | 0.874934  |
| RMSE: Root mean squared error, R <sup>2</sup> : Determination, Cal.: Calibration and Val.: Validation |      |           |             |           |           |

Table S4. The partial least squares regression model parameters used for prediction of Egyptian cultivar and German cultivar NIR data

| PLS   |           |           |           |           |                |
|-------|-----------|-----------|-----------|-----------|----------------|
| Assay | Data type | Slope     | Offset    | RMSE      | R <sup>2</sup> |
| ABTS  | Cal.      | 0.9466611 | 3.7356477 | 3.9583907 | 0.9466629      |
|       | Val.      | 0.0865979 | 71.092247 | 19.755322 | 0.0774332      |



RMSE: Root mean squared error, R<sup>2</sup>: Determination, Cal.: Calibration and Val.: Validation

Table S5: Antioxidant assays one way ANOVA results

| ANOVA  |                |                |    |             |        |      |
|--------|----------------|----------------|----|-------------|--------|------|
|        |                | Sum of Squares | df | Mean Square | F      | Sig. |
| TFC    | Between Groups | 1453.656       | 11 | 132.151     | 30.633 | .000 |
|        | Within Groups  | 103.536        | 24 | 4.314       |        |      |
|        | Total          | 1557.192       | 35 |             |        |      |
| TPC    | Between Groups | 8490.148       | 11 | 771.832     | 6.333  | .000 |
|        | Within Groups  | 2924.892       | 24 | 121.870     |        |      |
|        | Total          | 11415.040      | 35 |             |        |      |
| FRAP   | Between Groups | 561527.913     | 11 | 51047.992   | 21.711 | .000 |
|        | Within Groups  | 56430.605      | 24 | 2351.275    |        |      |
|        | Total          | 617958.518     | 35 |             |        |      |
| ABTS   | Between Groups | 288.036        | 11 | 26.185      | 30.013 | .000 |
|        | Within Groups  | 20.939         | 24 | .872        |        |      |
|        | Total          | 308.975        | 35 |             |        |      |
| CUPRAC | Between Groups | 8130.188       | 11 | 739.108     | 19.664 | .000 |
|        | Within Groups  | 902.074        | 24 | 37.586      |        |      |
|        | Total          | 9032.262       | 35 |             |        |      |

Table S6: Antioxidant assays one way ANOVA post hoc Tukey results

### Multiple Comparisons

| Dependent Variable |             |              |  | Mean Difference (I-J) | Std. Error | Sig.  | 95% Confidence Interval |             |
|--------------------|-------------|--------------|--|-----------------------|------------|-------|-------------------------|-------------|
|                    | (I) plantgp | (J) plantgp  |  |                       |            |       | Lower Bound             | Upper Bound |
| TFC                | Coriander   | Coriander    |  | -1.74292              | 1.69588    | .995  | -7.8576                 | 4.3718      |
|                    |             | Germany      |  |                       |            |       |                         |             |
|                    |             | Dill         |  | 1.91721               | 1.69588    | .990  | -4.1975                 | 8.0319      |
|                    |             | Dill Germany |  | .30501                | 1.69588    | 1.000 | -5.8097                 | 6.4197      |

|              |              |            |         |       |          |          |
|--------------|--------------|------------|---------|-------|----------|----------|
|              | Parsley      | 1.02397    | 1.69588 | 1.000 | -5.0907  | 7.1387   |
|              | Parsley      | -6.57952*  | 1.69588 | .027  | -12.6942 | -.4648   |
|              | Germany      |            |         |       |          |          |
|              | caraway      | -14.68410* | 1.69588 | .000  | -20.7988 | -8.5694  |
|              | Greater ammi | -19.28105* | 1.69588 | .000  | -25.3957 | -13.1663 |
|              | Fennel       | -8.97603*  | 1.69588 | .001  | -15.0907 | -2.8613  |
|              | Anise        | -5.22876   | 1.69588 | .145  | -11.3435 | .8859    |
|              | Celery       | -9.10675*  | 1.69588 | .001  | -15.2214 | -2.9921  |
|              | Visnaga      | -8.73639*  | 1.69588 | .001  | -14.8511 | -2.6217  |
| Coriander    | Coriander    | 1.74292    | 1.69588 | .995  | -4.3718  | 7.8576   |
| Germany      | Dill         | 3.66013    | 1.69588 | .591  | -2.4546  | 9.7748   |
|              | Dill Germany | 2.04793    | 1.69588 | .983  | -4.0668  | 8.1626   |
|              | Parsley      | 2.76689    | 1.69588 | .881  | -3.3478  | 8.8816   |
|              | Parsley      | -4.83660   | 1.69588 | .220  | -10.9513 | 1.2781   |
|              | Germany      |            |         |       |          |          |
|              | caraway      | -12.94118* | 1.69588 | .000  | -19.0559 | -6.8265  |
|              | Greater ammi | -17.53813* | 1.69588 | .000  | -23.6528 | -11.4234 |
|              | Fennel       | -7.23311*  | 1.69588 | .011  | -13.3478 | -1.1184  |
|              | Anise        | -3.48584   | 1.69588 | .655  | -9.6005  | 2.6289   |
|              | Celery       | -7.36383*  | 1.69588 | .009  | -13.4785 | -1.2491  |
|              | Visnaga      | -6.99347*  | 1.69588 | .016  | -13.1082 | -.8788   |
| Dill         | Coriander    | -1.91721   | 1.69588 | .990  | -8.0319  | 4.1975   |
|              | Coriander    | -3.66013   | 1.69588 | .591  | -9.7748  | 2.4546   |
|              | Germany      |            |         |       |          |          |
|              | Dill Germany | -1.61220   | 1.69588 | .998  | -7.7269  | 4.5025   |
|              | Parsley      | -.89325    | 1.69588 | 1.000 | -7.0079  | 5.2215   |
|              | Parsley      | -8.49674*  | 1.69588 | .002  | -14.6114 | -2.3820  |
|              | Germany      |            |         |       |          |          |
|              | caraway      | -16.60131* | 1.69588 | .000  | -22.7160 | -10.4866 |
|              | Greater ammi | -21.19826* | 1.69588 | .000  | -27.3130 | -15.0836 |
|              | Fennel       | -10.89325* | 1.69588 | .000  | -17.0079 | -4.7785  |
|              | Anise        | -7.14597*  | 1.69588 | .013  | -13.2607 | -1.0313  |
|              | Celery       | -11.02396* | 1.69588 | .000  | -17.1387 | -4.9093  |
|              | Visnaga      | -10.65360* | 1.69588 | .000  | -16.7683 | -4.5389  |
| Dill Germany | Coriander    | -.30501    | 1.69588 | 1.000 | -6.4197  | 5.8097   |
|              | Coriander    | -2.04793   | 1.69588 | .983  | -8.1626  | 4.0668   |
|              | Germany      |            |         |       |          |          |
|              | Dill         | 1.61220    | 1.69588 | .998  | -4.5025  | 7.7269   |

|                 |              |            |         |       |          |          |
|-----------------|--------------|------------|---------|-------|----------|----------|
|                 | Parsley      | .71896     | 1.69588 | 1.000 | -5.3957  | 6.8337   |
|                 | Parsley      | -6.88453*  | 1.69588 | .018  | -12.9992 | -.7698   |
|                 | Germany      |            |         |       |          |          |
|                 | caraway      | -14.98911* | 1.69588 | .000  | -21.1038 | -8.8744  |
|                 | Greater ammi | -19.58606* | 1.69588 | .000  | -25.7008 | -13.4714 |
|                 | Fennel       | -9.28104*  | 1.69588 | .001  | -15.3957 | -3.1663  |
|                 | Anise        | -5.53377   | 1.69588 | .102  | -11.6485 | .5809    |
|                 | Celery       | -9.41176*  | 1.69588 | .001  | -15.5265 | -3.2971  |
|                 | Visnaga      | -9.04140*  | 1.69588 | .001  | -15.1561 | -2.9267  |
| Parsley         | Coriander    | -1.02397   | 1.69588 | 1.000 | -7.1387  | 5.0907   |
|                 | Coriander    | -2.76689   | 1.69588 | .881  | -8.8816  | 3.3478   |
|                 | Germany      |            |         |       |          |          |
|                 | Dill         | .89325     | 1.69588 | 1.000 | -5.2215  | 7.0079   |
|                 | Dill Germany | -.71896    | 1.69588 | 1.000 | -6.8337  | 5.3957   |
|                 | Parsley      | -7.60349*  | 1.69588 | .007  | -13.7182 | -1.4888  |
|                 | Germany      |            |         |       |          |          |
|                 | caraway      | -15.70806* | 1.69588 | .000  | -21.8228 | -9.5934  |
|                 | Greater ammi | -20.30501* | 1.69588 | .000  | -26.4197 | -14.1903 |
|                 | Fennel       | -10.00000* | 1.69588 | .000  | -16.1147 | -3.8853  |
|                 | Anise        | -6.25273*  | 1.69588 | .042  | -12.3674 | -.1380   |
|                 | Celery       | -10.13072* | 1.69588 | .000  | -16.2454 | -4.0160  |
|                 | Visnaga      | -9.76035*  | 1.69588 | .000  | -15.8751 | -3.6457  |
| Parsley Germany | Coriander    | 6.57952*   | 1.69588 | .027  | .4648    | 12.6942  |
|                 | Coriander    | 4.83660    | 1.69588 | .220  | -1.2781  | 10.9513  |
|                 | Germany      |            |         |       |          |          |
|                 | Dill         | 8.49674*   | 1.69588 | .002  | 2.3820   | 14.6114  |
|                 | Dill Germany | 6.88453*   | 1.69588 | .018  | .7698    | 12.9992  |
|                 | Parsley      | 7.60349*   | 1.69588 | .007  | 1.4888   | 13.7182  |
|                 | caraway      | -8.10457*  | 1.69588 | .003  | -14.2193 | -1.9899  |
|                 | Greater ammi | -12.70152* | 1.69588 | .000  | -18.8162 | -6.5868  |
|                 | Fennel       | -2.39651   | 1.69588 | .949  | -8.5112  | 3.7182   |
|                 | Anise        | 1.35076    | 1.69588 | .999  | -4.7639  | 7.4655   |
|                 | Celery       | -2.52723   | 1.69588 | .929  | -8.6419  | 3.5875   |
|                 | Visnaga      | -2.15686   | 1.69588 | .975  | -8.2716  | 3.9578   |
| caraway         | Coriander    | 14.68410*  | 1.69588 | .000  | 8.5694   | 20.7988  |
|                 | Coriander    | 12.94118*  | 1.69588 | .000  | 6.8265   | 19.0559  |
|                 | Germany      |            |         |       |          |          |
|                 | Dill         | 16.60131*  | 1.69588 | .000  | 10.4866  | 22.7160  |

|              |                   |            |         |       |          |         |
|--------------|-------------------|------------|---------|-------|----------|---------|
|              | Dill Germany      | 14.98911*  | 1.69588 | .000  | 8.8744   | 21.1038 |
|              | Parsley           | 15.70806*  | 1.69588 | .000  | 9.5934   | 21.8228 |
|              | Parsley Germany   | 8.10457*   | 1.69588 | .003  | 1.9899   | 14.2193 |
|              | Greater ammi      | -4.59695   | 1.69588 | .279  | -10.7116 | 1.5177  |
|              | Fennel            | 5.70806    | 1.69588 | .083  | -.4066   | 11.8228 |
|              | Anise             | 9.45534*   | 1.69588 | .000  | 3.3406   | 15.5700 |
|              | Celery            | 5.57735    | 1.69588 | .097  | -.5374   | 11.6920 |
|              | Visnaga           | 5.94771    | 1.69588 | .062  | -.1670   | 12.0624 |
| Greater ammi | Coriander         | 19.28105*  | 1.69588 | .000  | 13.1663  | 25.3957 |
|              | Coriander Germany | 17.53813*  | 1.69588 | .000  | 11.4234  | 23.6528 |
|              | Dill              | 21.19826*  | 1.69588 | .000  | 15.0836  | 27.3130 |
|              | Dill Germany      | 19.58606*  | 1.69588 | .000  | 13.4714  | 25.7008 |
|              | Parsley           | 20.30501*  | 1.69588 | .000  | 14.1903  | 26.4197 |
|              | Parsley Germany   | 12.70152*  | 1.69588 | .000  | 6.5868   | 18.8162 |
|              | caraway           | 4.59695    | 1.69588 | .279  | -1.5177  | 10.7116 |
|              | Fennel            | 10.30501*  | 1.69588 | .000  | 4.1903   | 16.4197 |
|              | Anise             | 14.05229*  | 1.69588 | .000  | 7.9376   | 20.1670 |
|              | Celery            | 10.17430*  | 1.69588 | .000  | 4.0596   | 16.2890 |
|              | Visnaga           | 10.54466*  | 1.69588 | .000  | 4.4300   | 16.6594 |
| Fennel       | Coriander         | 8.97603*   | 1.69588 | .001  | 2.8613   | 15.0907 |
|              | Coriander Germany | 7.23311*   | 1.69588 | .011  | 1.1184   | 13.3478 |
|              | Dill              | 10.89325*  | 1.69588 | .000  | 4.7785   | 17.0079 |
|              | Dill Germany      | 9.28104*   | 1.69588 | .001  | 3.1663   | 15.3957 |
|              | Parsley           | 10.00000*  | 1.69588 | .000  | 3.8853   | 16.1147 |
|              | Parsley Germany   | 2.39651    | 1.69588 | .949  | -3.7182  | 8.5112  |
|              | caraway           | -5.70806   | 1.69588 | .083  | -11.8228 | .4066   |
|              | Greater ammi      | -10.30501* | 1.69588 | .000  | -16.4197 | -4.1903 |
|              | Anise             | 3.74727    | 1.69588 | .558  | -2.3674  | 9.8620  |
|              | Celery            | -.13072    | 1.69588 | 1.000 | -6.2454  | 5.9840  |
|              | Visnaga           | .23965     | 1.69588 | 1.000 | -5.8751  | 6.3543  |
| Anise        | Coriander         | 5.22876    | 1.69588 | .145  | -.8859   | 11.3435 |
|              | Coriander Germany | 3.48584    | 1.69588 | .655  | -2.6289  | 9.6005  |

|         |           |                   |            |         |       |          |         |
|---------|-----------|-------------------|------------|---------|-------|----------|---------|
|         |           | Dill              | 7.14597*   | 1.69588 | .013  | 1.0313   | 13.2607 |
|         |           | Dill Germany      | 5.53377    | 1.69588 | .102  | -.5809   | 11.6485 |
|         |           | Parsley           | 6.25273*   | 1.69588 | .042  | .1380    | 12.3674 |
|         |           | Parsley Germany   | -1.35076   | 1.69588 | .999  | -7.4655  | 4.7639  |
|         |           | caraway           | -9.45534*  | 1.69588 | .000  | -15.5700 | -3.3406 |
|         |           | Greater ammi      | -14.05229* | 1.69588 | .000  | -20.1670 | -7.9376 |
|         |           | Fennel            | -3.74727   | 1.69588 | .558  | -9.8620  | 2.3674  |
|         |           | Celery            | -3.87799   | 1.69588 | .510  | -9.9927  | 2.2367  |
|         |           | Visnaga           | -3.50763   | 1.69588 | .647  | -9.6223  | 2.6071  |
| Celery  |           | Coriander         | 9.10675*   | 1.69588 | .001  | 2.9921   | 15.2214 |
|         |           | Coriander Germany | 7.36383*   | 1.69588 | .009  | 1.2491   | 13.4785 |
|         |           | Dill              | 11.02396*  | 1.69588 | .000  | 4.9093   | 17.1387 |
|         |           | Dill Germany      | 9.41176*   | 1.69588 | .001  | 3.2971   | 15.5265 |
|         |           | Parsley           | 10.13072*  | 1.69588 | .000  | 4.0160   | 16.2454 |
|         |           | Parsley Germany   | 2.52723    | 1.69588 | .929  | -3.5875  | 8.6419  |
|         |           | caraway           | -5.57735   | 1.69588 | .097  | -11.6920 | .5374   |
|         |           | Greater ammi      | -10.17430* | 1.69588 | .000  | -16.2890 | -4.0596 |
|         |           | Fennel            | .13072     | 1.69588 | 1.000 | -5.9840  | 6.2454  |
|         |           | Anise             | 3.87799    | 1.69588 | .510  | -2.2367  | 9.9927  |
| Visnaga |           | Visnaga           | .37036     | 1.69588 | 1.000 | -5.7443  | 6.4851  |
|         |           | Coriander         | 8.73639*   | 1.69588 | .001  | 2.6217   | 14.8511 |
|         |           | Coriander Germany | 6.99347*   | 1.69588 | .016  | .8788    | 13.1082 |
|         |           | Dill              | 10.65360*  | 1.69588 | .000  | 4.5389   | 16.7683 |
|         |           | Dill Germany      | 9.04140*   | 1.69588 | .001  | 2.9267   | 15.1561 |
|         |           | Parsley           | 9.76035*   | 1.69588 | .000  | 3.6457   | 15.8751 |
|         |           | Parsley Germany   | 2.15686    | 1.69588 | .975  | -3.9578  | 8.2716  |
|         |           | caraway           | -5.94771   | 1.69588 | .062  | -12.0624 | .1670   |
|         |           | Greater ammi      | -10.54466* | 1.69588 | .000  | -16.6594 | -4.4300 |
|         |           | Fennel            | -.23965    | 1.69588 | 1.000 | -6.3543  | 5.8751  |
| TPC     | Coriander | Anise             | 3.50763    | 1.69588 | .647  | -2.6071  | 9.6223  |
|         |           | Celery            | -.37036    | 1.69588 | 1.000 | -6.4851  | 5.7443  |
|         |           | Coriander Germany | -8.73656   | 9.01371 | .997  | -41.2367 | 23.7635 |
|         |           |                   |            |         |       |          |         |

|              |              |            |         |       |          |          |
|--------------|--------------|------------|---------|-------|----------|----------|
|              | Dill         | -8.51613   | 9.01371 | .998  | -41.0162 | 23.9840  |
|              | Dill Germany | 2.14516    | 9.01371 | 1.000 | -30.3549 | 34.6453  |
|              | Parsley      | -1.17204   | 9.01371 | 1.000 | -33.6721 | 31.3281  |
|              | Parsley      | -5.90860   | 9.01371 | 1.000 | -38.4087 | 26.5915  |
|              | Germany      |            |         |       |          |          |
|              | caraway      | -29.94623  | 9.01371 | .090  | -62.4463 | 2.5539   |
|              | Greater ammi | -55.19892* | 9.01371 | .000  | -87.6990 | -22.6988 |
|              | Fennel       | -23.70430  | 9.01371 | .317  | -56.2044 | 8.7958   |
|              | Anise        | -12.15054  | 9.01371 | .963  | -44.6506 | 20.3496  |
|              | Celery       | -12.71505  | 9.01371 | .950  | -45.2152 | 19.7851  |
|              | Visnaga      | -20.35484  | 9.01371 | .528  | -52.8549 | 12.1453  |
| Coriander    | Coriander    | 8.73656    | 9.01371 | .997  | -23.7635 | 41.2367  |
|              | Dill         | .22043     | 9.01371 | 1.000 | -32.2797 | 32.7205  |
|              | Dill Germany | 10.88172   | 9.01371 | .983  | -21.6184 | 43.3818  |
|              | Parsley      | 7.56452    | 9.01371 | .999  | -24.9356 | 40.0646  |
|              | Parsley      | 2.82796    | 9.01371 | 1.000 | -29.6721 | 35.3281  |
|              | Germany      |            |         |       |          |          |
|              | caraway      | -21.20967  | 9.01371 | .470  | -53.7098 | 11.2904  |
|              | Greater ammi | -46.46236* | 9.01371 | .001  | -78.9625 | -13.9623 |
|              | Fennel       | -14.96774  | 9.01371 | .869  | -47.4678 | 17.5324  |
|              | Anise        | -3.41398   | 9.01371 | 1.000 | -35.9141 | 29.0861  |
|              | Celery       | -3.97849   | 9.01371 | 1.000 | -36.4786 | 28.5216  |
| Dill         | Visnaga      | -11.61828  | 9.01371 | .973  | -44.1184 | 20.8818  |
|              | Coriander    | 8.51613    | 9.01371 | .998  | -23.9840 | 41.0162  |
|              | Coriander    | -.22043    | 9.01371 | 1.000 | -32.7205 | 32.2797  |
|              | Germany      |            |         |       |          |          |
|              | Dill Germany | 10.66129   | 9.01371 | .985  | -21.8388 | 43.1614  |
|              | Parsley      | 7.34409    | 9.01371 | .999  | -25.1560 | 39.8442  |
|              | Parsley      | 2.60753    | 9.01371 | 1.000 | -29.8926 | 35.1076  |
|              | Germany      |            |         |       |          |          |
|              | caraway      | -21.43010  | 9.01371 | .455  | -53.9302 | 11.0700  |
|              | Greater ammi | -46.68279* | 9.01371 | .001  | -79.1829 | -14.1827 |
|              | Fennel       | -15.18817  | 9.01371 | .858  | -47.6883 | 17.3119  |
| Dill Germany | Anise        | -3.63441   | 9.01371 | 1.000 | -36.1345 | 28.8657  |
|              | Celery       | -4.19892   | 9.01371 | 1.000 | -36.6990 | 28.3012  |
|              | Visnaga      | -11.83871  | 9.01371 | .969  | -44.3388 | 20.6614  |
|              | Coriander    | -2.14516   | 9.01371 | 1.000 | -34.6453 | 30.3549  |

|                 |              |            |         |       |          |          |
|-----------------|--------------|------------|---------|-------|----------|----------|
|                 | Coriander    | -10.88172  | 9.01371 | .983  | -43.3818 | 21.6184  |
|                 | Germany      |            |         |       |          |          |
|                 | Dill         | -10.66129  | 9.01371 | .985  | -43.1614 | 21.8388  |
|                 | Parsley      | -3.31720   | 9.01371 | 1.000 | -35.8173 | 29.1829  |
|                 | Parsley      | -8.05376   | 9.01371 | .999  | -40.5539 | 24.4463  |
|                 | Germany      |            |         |       |          |          |
|                 | caraway      | -32.09139  | 9.01371 | .055  | -64.5915 | .4087    |
|                 | Greater ammi | -57.34408* | 9.01371 | .000  | -89.8442 | -24.8440 |
|                 | Fennel       | -25.84946  | 9.01371 | .214  | -58.3496 | 6.6506   |
|                 | Anise        | -14.29570  | 9.01371 | .898  | -46.7958 | 18.2044  |
|                 | Celery       | -14.86021  | 9.01371 | .874  | -47.3603 | 17.6399  |
|                 | Visnaga      | -22.50000  | 9.01371 | .387  | -55.0001 | 10.0001  |
| Parsley         | Coriander    | 1.17204    | 9.01371 | 1.000 | -31.3281 | 33.6721  |
|                 | Coriander    | -7.56452   | 9.01371 | .999  | -40.0646 | 24.9356  |
|                 | Germany      |            |         |       |          |          |
|                 | Dill         | -7.34409   | 9.01371 | .999  | -39.8442 | 25.1560  |
|                 | Dill Germany | 3.31720    | 9.01371 | 1.000 | -29.1829 | 35.8173  |
|                 | Parsley      | -4.73656   | 9.01371 | 1.000 | -37.2367 | 27.7635  |
|                 | Germany      |            |         |       |          |          |
|                 | caraway      | -28.77419  | 9.01371 | .117  | -61.2743 | 3.7259   |
|                 | Greater ammi | -54.02688* | 9.01371 | .000  | -86.5270 | -21.5268 |
|                 | Fennel       | -22.53226  | 9.01371 | .385  | -55.0324 | 9.9678   |
|                 | Anise        | -10.97850  | 9.01371 | .982  | -43.4786 | 21.5216  |
|                 | Celery       | -11.54301  | 9.01371 | .974  | -44.0431 | 20.9571  |
|                 | Visnaga      | -19.18280  | 9.01371 | .610  | -51.6829 | 13.3173  |
| Parsley Germany | Coriander    | 5.90860    | 9.01371 | 1.000 | -26.5915 | 38.4087  |
|                 | Coriander    | -2.82796   | 9.01371 | 1.000 | -35.3281 | 29.6721  |
|                 | Germany      |            |         |       |          |          |
|                 | Dill         | -2.60753   | 9.01371 | 1.000 | -35.1076 | 29.8926  |
|                 | Dill Germany | 8.05376    | 9.01371 | .999  | -24.4463 | 40.5539  |
|                 | Parsley      | 4.73656    | 9.01371 | 1.000 | -27.7635 | 37.2367  |
|                 | caraway      | -24.03763  | 9.01371 | .299  | -56.5377 | 8.4625   |
|                 | Greater ammi | -49.29032* | 9.01371 | .001  | -81.7904 | -16.7902 |
|                 | Fennel       | -17.79570  | 9.01371 | .705  | -50.2958 | 14.7044  |
|                 | Anise        | -6.24194   | 9.01371 | 1.000 | -38.7420 | 26.2582  |
|                 | Celery       | -6.80645   | 9.01371 | 1.000 | -39.3066 | 25.6937  |
|                 | Visnaga      | -14.44624  | 9.01371 | .892  | -46.9463 | 18.0539  |
| caraway         | Coriander    | 29.94623   | 9.01371 | .090  | -2.5539  | 62.4463  |

|              |                      |           |         |       |          |         |
|--------------|----------------------|-----------|---------|-------|----------|---------|
|              | Coriander<br>Germany | 21.20967  | 9.01371 | .470  | -11.2904 | 53.7098 |
|              | Dill                 | 21.43010  | 9.01371 | .455  | -11.0700 | 53.9302 |
|              | Dill Germany         | 32.09139  | 9.01371 | .055  | -.4087   | 64.5915 |
|              | Parsley              | 28.77419  | 9.01371 | .117  | -3.7259  | 61.2743 |
|              | Parsley<br>Germany   | 24.03763  | 9.01371 | .299  | -8.4625  | 56.5377 |
|              | Greater ammi         | -25.25269 | 9.01371 | .240  | -57.7528 | 7.2474  |
|              | Fennel               | 6.24193   | 9.01371 | 1.000 | -26.2582 | 38.7420 |
|              | Anise                | 17.79569  | 9.01371 | .705  | -14.7044 | 50.2958 |
|              | Celery               | 17.23118  | 9.01371 | .742  | -15.2689 | 49.7313 |
|              | Visnaga              | 9.59139   | 9.01371 | .994  | -22.9087 | 42.0915 |
| Greater ammi | Coriander            | 55.19892* | 9.01371 | .000  | 22.6988  | 87.6990 |
|              | Coriander<br>Germany | 46.46236* | 9.01371 | .001  | 13.9623  | 78.9625 |
|              | Dill                 | 46.68279* | 9.01371 | .001  | 14.1827  | 79.1829 |
|              | Dill Germany         | 57.34408* | 9.01371 | .000  | 24.8440  | 89.8442 |
|              | Parsley              | 54.02688* | 9.01371 | .000  | 21.5268  | 86.5270 |
|              | Parsley<br>Germany   | 49.29032* | 9.01371 | .001  | 16.7902  | 81.7904 |
|              | caraway              | 25.25269  | 9.01371 | .240  | -7.2474  | 57.7528 |
|              | Fennel               | 31.49462  | 9.01371 | .063  | -1.0055  | 63.9947 |
|              | Anise                | 43.04838* | 9.01371 | .003  | 10.5483  | 75.5485 |
|              | Celery               | 42.48387* | 9.01371 | .004  | 9.9838   | 74.9840 |
|              | Visnaga              | 34.84408* | 9.01371 | .028  | 2.3440   | 67.3442 |
| Fennel       | Coriander            | 23.70430  | 9.01371 | .317  | -8.7958  | 56.2044 |
|              | Coriander<br>Germany | 14.96774  | 9.01371 | .869  | -17.5324 | 47.4678 |
|              | Dill                 | 15.18817  | 9.01371 | .858  | -17.3119 | 47.6883 |
|              | Dill Germany         | 25.84946  | 9.01371 | .214  | -6.6506  | 58.3496 |
|              | Parsley              | 22.53226  | 9.01371 | .385  | -9.9678  | 55.0324 |
|              | Parsley<br>Germany   | 17.79570  | 9.01371 | .705  | -14.7044 | 50.2958 |
|              | caraway              | -6.24193  | 9.01371 | 1.000 | -38.7420 | 26.2582 |
|              | Greater ammi         | -31.49462 | 9.01371 | .063  | -63.9947 | 1.0055  |
|              | Anise                | 11.55376  | 9.01371 | .974  | -20.9463 | 44.0539 |
|              | Celery               | 10.98925  | 9.01371 | .982  | -21.5109 | 43.4894 |
|              | Visnaga              | 3.34946   | 9.01371 | 1.000 | -29.1506 | 35.8496 |



|         |              |            |         |       |          |          |
|---------|--------------|------------|---------|-------|----------|----------|
| Anise   | Coriander    | 12.15054   | 9.01371 | .963  | -20.3496 | 44.6506  |
|         | Coriander    | 3.41398    | 9.01371 | 1.000 | -29.0861 | 35.9141  |
|         | Germany      |            |         |       |          |          |
|         | Dill         | 3.63441    | 9.01371 | 1.000 | -28.8657 | 36.1345  |
|         | Dill Germany | 14.29570   | 9.01371 | .898  | -18.2044 | 46.7958  |
|         | Parsley      | 10.97850   | 9.01371 | .982  | -21.5216 | 43.4786  |
|         | Parsley      | 6.24194    | 9.01371 | 1.000 | -26.2582 | 38.7420  |
|         | Germany      |            |         |       |          |          |
|         | caraway      | -17.79569  | 9.01371 | .705  | -50.2958 | 14.7044  |
|         | Greater ammi | -43.04838* | 9.01371 | .003  | -75.5485 | -10.5483 |
|         | Fennel       | -11.55376  | 9.01371 | .974  | -44.0539 | 20.9463  |
|         | Celery       | -.56451    | 9.01371 | 1.000 | -33.0646 | 31.9356  |
|         | Visnaga      | -8.20430   | 9.01371 | .998  | -40.7044 | 24.2958  |
| Celery  | Coriander    | 12.71505   | 9.01371 | .950  | -19.7851 | 45.2152  |
|         | Coriander    | 3.97849    | 9.01371 | 1.000 | -28.5216 | 36.4786  |
|         | Germany      |            |         |       |          |          |
|         | Dill         | 4.19892    | 9.01371 | 1.000 | -28.3012 | 36.6990  |
|         | Dill Germany | 14.86021   | 9.01371 | .874  | -17.6399 | 47.3603  |
|         | Parsley      | 11.54301   | 9.01371 | .974  | -20.9571 | 44.0431  |
|         | Parsley      | 6.80645    | 9.01371 | 1.000 | -25.6937 | 39.3066  |
|         | Germany      |            |         |       |          |          |
|         | caraway      | -17.23118  | 9.01371 | .742  | -49.7313 | 15.2689  |
|         | Greater ammi | -42.48387* | 9.01371 | .004  | -74.9840 | -9.9838  |
|         | Fennel       | -10.98925  | 9.01371 | .982  | -43.4894 | 21.5109  |
|         | Anise        | .56451     | 9.01371 | 1.000 | -31.9356 | 33.0646  |
|         | Visnaga      | -7.63979   | 9.01371 | .999  | -40.1399 | 24.8603  |
| Visnaga | Coriander    | 20.35484   | 9.01371 | .528  | -12.1453 | 52.8549  |
|         | Coriander    | 11.61828   | 9.01371 | .973  | -20.8818 | 44.1184  |
|         | Germany      |            |         |       |          |          |
|         | Dill         | 11.83871   | 9.01371 | .969  | -20.6614 | 44.3388  |
|         | Dill Germany | 22.50000   | 9.01371 | .387  | -10.0001 | 55.0001  |
|         | Parsley      | 19.18280   | 9.01371 | .610  | -13.3173 | 51.6829  |
|         | Parsley      | 14.44624   | 9.01371 | .892  | -18.0539 | 46.9463  |
|         | Germany      |            |         |       |          |          |
|         | caraway      | -9.59139   | 9.01371 | .994  | -42.0915 | 22.9087  |
|         | Greater ammi | -34.84408* | 9.01371 | .028  | -67.3442 | -2.3440  |
|         | Fennel       | -3.34946   | 9.01371 | 1.000 | -35.8496 | 29.1506  |
|         | Anise        | 8.20430    | 9.01371 | .998  | -24.2958 | 40.7044  |

|      |                      |              |             |          |       |           |           |
|------|----------------------|--------------|-------------|----------|-------|-----------|-----------|
|      |                      |              |             |          |       |           |           |
| FRAP | Coriander            | Celery       | 7.63979     | 9.01371  | .999  | -24.8603  | 40.1399   |
|      |                      | Coriander    | 131.80702   | 39.59188 | .089  | -10.9466  | 274.5607  |
|      |                      | Germany      |             |          |       |           |           |
|      |                      | Dill         | 55.14036    | 39.59188 | .954  | -87.6133  | 197.8940  |
|      |                      | Dill Germany | 120.92983   | 39.59188 | .153  | -21.8238  | 263.6835  |
|      |                      | Parsley      | 135.29825   | 39.59188 | .074  | -7.4554   | 278.0519  |
|      |                      | Parsley      | 114.38597   | 39.59188 | .206  | -28.3677  | 257.1396  |
|      |                      | Germany      |             |          |       |           |           |
|      |                      | caraway      | -121.92982  | 39.59188 | .146  | -264.6835 | 20.8238   |
|      |                      | Greater ammi | -38.75439   | 39.59188 | .997  | -181.5080 | 103.9992  |
|      |                      | Fennel       | -86.38596   | 39.59188 | .576  | -229.1396 | 56.3677   |
|      |                      | Anise        | -162.87719* | 39.59188 | .016  | -305.6308 | -20.1236  |
|      |                      | Celery       | 166.29825*  | 39.59188 | .013  | 23.5446   | 309.0519  |
|      |                      | Visnaga      | -208.92982* | 39.59188 | .001  | -351.6835 | -66.1762  |
|      | Coriander<br>Germany | Coriander    | -131.80702  | 39.59188 | .089  | -274.5607 | 10.9466   |
|      |                      | Dill         | -76.66666   | 39.59188 | .727  | -219.4203 | 66.0870   |
|      |                      | Dill Germany | -10.87719   | 39.59188 | 1.000 | -153.6308 | 131.8764  |
|      |                      | Parsley      | 3.49123     | 39.59188 | 1.000 | -139.2624 | 146.2449  |
|      |                      | Parsley      | -17.42105   | 39.59188 | 1.000 | -160.1747 | 125.3326  |
|      |                      | Germany      |             |          |       |           |           |
|      |                      | caraway      | -253.73684* | 39.59188 | .000  | -396.4905 | -110.9832 |
|      |                      | Greater ammi | -170.56141* | 39.59188 | .010  | -313.3150 | -27.8078  |
|      |                      | Fennel       | -218.19298* | 39.59188 | .001  | -360.9466 | -75.4393  |
|      |                      | Anise        | -294.68421* | 39.59188 | .000  | -437.4378 | -151.9306 |
|      | Dill                 | Celery       | 34.49123    | 39.59188 | .999  | -108.2624 | 177.2449  |
|      |                      | Visnaga      | -340.73684* | 39.59188 | .000  | -483.4905 | -197.9832 |
|      |                      | Coriander    | -55.14036   | 39.59188 | .954  | -197.8940 | 87.6133   |
|      |                      | Coriander    | 76.66666    | 39.59188 | .727  | -66.0870  | 219.4203  |
|      |                      | Germany      |             |          |       |           |           |
|      |                      | Dill Germany | 65.78947    | 39.59188 | .868  | -76.9642  | 208.5431  |
|      |                      | Parsley      | 80.15789    | 39.59188 | .674  | -62.5957  | 222.9115  |
|      |                      | Parsley      | 59.24561    | 39.59188 | .928  | -83.5080  | 201.9992  |
|      |                      | Germany      |             |          |       |           |           |
|      |                      | caraway      | -177.07018* | 39.59188 | .007  | -319.8238 | -34.3165  |
|      |                      | Greater ammi | -93.89474   | 39.59188 | .459  | -236.6484 | 48.8589   |
|      |                      | Fennel       | -141.52632  | 39.59188 | .053  | -284.2800 | 1.2273    |
|      |                      | Anise        | -218.01755* | 39.59188 | .001  | -360.7712 | -75.2639  |
|      |                      | Celery       | 111.15789   | 39.59188 | .238  | -31.5957  | 253.9115  |

|                 |                      |             |          |       |           |           |
|-----------------|----------------------|-------------|----------|-------|-----------|-----------|
|                 | Visnaga              | -264.07018* | 39.59188 | .000  | -406.8238 | -121.3165 |
| Dill Germany    | Coriander            | -120.92983  | 39.59188 | .153  | -263.6835 | 21.8238   |
|                 | Coriander<br>Germany | 10.87719    | 39.59188 | 1.000 | -131.8764 | 153.6308  |
|                 | Dill                 | -65.78947   | 39.59188 | .868  | -208.5431 | 76.9642   |
|                 | Parsley              | 14.36842    | 39.59188 | 1.000 | -128.3852 | 157.1221  |
|                 | Parsley<br>Germany   | -6.54386    | 39.59188 | 1.000 | -149.2975 | 136.2098  |
|                 | caraway              | -242.85965* | 39.59188 | .000  | -385.6133 | -100.1060 |
|                 | Greater ammi         | -159.68421* | 39.59188 | .019  | -302.4378 | -16.9306  |
|                 | Fennel               | -207.31579* | 39.59188 | .001  | -350.0694 | -64.5622  |
|                 | Anise                | -283.80702* | 39.59188 | .000  | -426.5607 | -141.0534 |
|                 | Celery               | 45.36842    | 39.59188 | .989  | -97.3852  | 188.1221  |
|                 | Visnaga              | -329.85965* | 39.59188 | .000  | -472.6133 | -187.1060 |
| Parsley         | Coriander            | -135.29825  | 39.59188 | .074  | -278.0519 | 7.4554    |
|                 | Coriander<br>Germany | -3.49123    | 39.59188 | 1.000 | -146.2449 | 139.2624  |
|                 | Dill                 | -80.15789   | 39.59188 | .674  | -222.9115 | 62.5957   |
|                 | Dill Germany         | -14.36842   | 39.59188 | 1.000 | -157.1221 | 128.3852  |
|                 | Parsley<br>Germany   | -20.91228   | 39.59188 | 1.000 | -163.6659 | 121.8414  |
|                 | caraway              | -257.22807* | 39.59188 | .000  | -399.9817 | -114.4744 |
|                 | Greater ammi         | -174.05263* | 39.59188 | .008  | -316.8063 | -31.2990  |
|                 | Fennel               | -221.68421* | 39.59188 | .000  | -364.4378 | -78.9306  |
|                 | Anise                | -298.17544* | 39.59188 | .000  | -440.9291 | -155.4218 |
|                 | Celery               | 31.00000    | 39.59188 | 1.000 | -111.7536 | 173.7536  |
|                 | Visnaga              | -344.22807* | 39.59188 | .000  | -486.9817 | -201.4744 |
| Parsley Germany | Coriander            | -114.38597  | 39.59188 | .206  | -257.1396 | 28.3677   |
|                 | Coriander<br>Germany | 17.42105    | 39.59188 | 1.000 | -125.3326 | 160.1747  |
|                 | Dill                 | -59.24561   | 39.59188 | .928  | -201.9992 | 83.5080   |
|                 | Dill Germany         | 6.54386     | 39.59188 | 1.000 | -136.2098 | 149.2975  |
|                 | Parsley              | 20.91228    | 39.59188 | 1.000 | -121.8414 | 163.6659  |
|                 | caraway              | -236.31579* | 39.59188 | .000  | -379.0694 | -93.5622  |
|                 | Greater ammi         | -153.14036* | 39.59188 | .028  | -295.8940 | -10.3867  |
|                 | Fennel               | -200.77193* | 39.59188 | .002  | -343.5256 | -58.0183  |
|                 | Anise                | -277.26316* | 39.59188 | .000  | -420.0168 | -134.5095 |
|                 | Celery               | 51.91228    | 39.59188 | .969  | -90.8414  | 194.6659  |

|              |              |             |          |      |           |           |
|--------------|--------------|-------------|----------|------|-----------|-----------|
| caraway      | Visnaga      | -323.31579* | 39.59188 | .000 | -466.0694 | -180.5622 |
|              | Coriander    | 121.92982   | 39.59188 | .146 | -20.8238  | 264.6835  |
|              | Coriander    | 253.73684*  | 39.59188 | .000 | 110.9832  | 396.4905  |
|              | Germany      |             |          |      |           |           |
|              | Dill         | 177.07018*  | 39.59188 | .007 | 34.3165   | 319.8238  |
|              | Dill Germany | 242.85965*  | 39.59188 | .000 | 100.1060  | 385.6133  |
|              | Parsley      | 257.22807*  | 39.59188 | .000 | 114.4744  | 399.9817  |
|              | Parsley      | 236.31579*  | 39.59188 | .000 | 93.5622   | 379.0694  |
|              | Germany      |             |          |      |           |           |
|              | Greater ammi | 83.17544    | 39.59188 | .627 | -59.5782  | 225.9291  |
|              | Fennel       | 35.54386    | 39.59188 | .998 | -107.2098 | 178.2975  |
|              | Anise        | -40.94737   | 39.59188 | .995 | -183.7010 | 101.8063  |
|              | Celery       | 288.22807*  | 39.59188 | .000 | 145.4744  | 430.9817  |
|              | Visnaga      | -87.00000   | 39.59188 | .566 | -229.7536 | 55.7536   |
| Greater ammi | Coriander    | 38.75439    | 39.59188 | .997 | -103.9992 | 181.5080  |
|              | Coriander    | 170.56141*  | 39.59188 | .010 | 27.8078   | 313.3150  |
|              | Germany      |             |          |      |           |           |
|              | Dill         | 93.89474    | 39.59188 | .459 | -48.8589  | 236.6484  |
|              | Dill Germany | 159.68421*  | 39.59188 | .019 | 16.9306   | 302.4378  |
|              | Parsley      | 174.05263*  | 39.59188 | .008 | 31.2990   | 316.8063  |
|              | Parsley      | 153.14036*  | 39.59188 | .028 | 10.3867   | 295.8940  |
|              | Germany      |             |          |      |           |           |
|              | caraway      | -83.17544   | 39.59188 | .627 | -225.9291 | 59.5782   |
|              | Fennel       | -47.63157   | 39.59188 | .984 | -190.3852 | 95.1221   |
|              | Anise        | -124.12280  | 39.59188 | .131 | -266.8764 | 18.6308   |
|              | Celery       | 205.05264*  | 39.59188 | .001 | 62.2990   | 347.8063  |
|              | Visnaga      | -170.17544* | 39.59188 | .010 | -312.9291 | -27.4218  |
|              | Coriander    | 86.38596    | 39.59188 | .576 | -56.3677  | 229.1396  |
| Fennel       | Coriander    | 218.19298*  | 39.59188 | .001 | 75.4393   | 360.9466  |
|              | Germany      |             |          |      |           |           |
|              | Dill         | 141.52632   | 39.59188 | .053 | -1.2273   | 284.2800  |
|              | Dill Germany | 207.31579*  | 39.59188 | .001 | 64.5622   | 350.0694  |
|              | Parsley      | 221.68421*  | 39.59188 | .000 | 78.9306   | 364.4378  |
|              | Parsley      | 200.77193*  | 39.59188 | .002 | 58.0183   | 343.5256  |
|              | Germany      |             |          |      |           |           |
|              | caraway      | -35.54386   | 39.59188 | .998 | -178.2975 | 107.2098  |
|              | Greater ammi | 47.63157    | 39.59188 | .984 | -95.1221  | 190.3852  |
|              | Anise        | -76.49123   | 39.59188 | .730 | -219.2449 | 66.2624   |

|         |              |             |          |       |           |           |
|---------|--------------|-------------|----------|-------|-----------|-----------|
| Anise   | Celery       | 252.68421*  | 39.59188 | .000  | 109.9306  | 395.4378  |
|         | Visnaga      | -122.54386  | 39.59188 | .141  | -265.2975 | 20.2098   |
|         | Coriander    | 162.87719*  | 39.59188 | .016  | 20.1236   | 305.6308  |
|         | Coriander    | 294.68421*  | 39.59188 | .000  | 151.9306  | 437.4378  |
|         | Germany      |             |          |       |           |           |
|         | Dill         | 218.01755*  | 39.59188 | .001  | 75.2639   | 360.7712  |
|         | Dill Germany | 283.80702*  | 39.59188 | .000  | 141.0534  | 426.5607  |
|         | Parsley      | 298.17544*  | 39.59188 | .000  | 155.4218  | 440.9291  |
|         | Parsley      | 277.26316*  | 39.59188 | .000  | 134.5095  | 420.0168  |
|         | Germany      |             |          |       |           |           |
|         | caraway      | 40.94737    | 39.59188 | .995  | -101.8063 | 183.7010  |
|         | Greater ammi | 124.12280   | 39.59188 | .131  | -18.6308  | 266.8764  |
|         | Fennel       | 76.49123    | 39.59188 | .730  | -66.2624  | 219.2449  |
|         | Celery       | 329.17544*  | 39.59188 | .000  | 186.4218  | 471.9291  |
|         | Visnaga      | -46.05263   | 39.59188 | .987  | -188.8063 | 96.7010   |
| Celery  | Coriander    | -166.29825* | 39.59188 | .013  | -309.0519 | -23.5446  |
|         | Coriander    | -34.49123   | 39.59188 | .999  | -177.2449 | 108.2624  |
|         | Germany      |             |          |       |           |           |
|         | Dill         | -111.15789  | 39.59188 | .238  | -253.9115 | 31.5957   |
|         | Dill Germany | -45.36842   | 39.59188 | .989  | -188.1221 | 97.3852   |
|         | Parsley      | -31.00000   | 39.59188 | 1.000 | -173.7536 | 111.7536  |
|         | Parsley      | -51.91228   | 39.59188 | .969  | -194.6659 | 90.8414   |
|         | Germany      |             |          |       |           |           |
|         | caraway      | -288.22807* | 39.59188 | .000  | -430.9817 | -145.4744 |
|         | Greater ammi | -205.05264* | 39.59188 | .001  | -347.8063 | -62.2990  |
|         | Fennel       | -252.68421* | 39.59188 | .000  | -395.4378 | -109.9306 |
|         | Anise        | -329.17544* | 39.59188 | .000  | -471.9291 | -186.4218 |
|         | Visnaga      | -375.22807* | 39.59188 | .000  | -517.9817 | -232.4744 |
|         | Coriander    | 208.92982*  | 39.59188 | .001  | 66.1762   | 351.6835  |
|         | Coriander    | 340.73684*  | 39.59188 | .000  | 197.9832  | 483.4905  |
|         | Germany      |             |          |       |           |           |
| Visnaga | Dill         | 264.07018*  | 39.59188 | .000  | 121.3165  | 406.8238  |
|         | Dill Germany | 329.85965*  | 39.59188 | .000  | 187.1060  | 472.6133  |
|         | Parsley      | 344.22807*  | 39.59188 | .000  | 201.4744  | 486.9817  |
|         | Parsley      | 323.31579*  | 39.59188 | .000  | 180.5622  | 466.0694  |
|         | Germany      |             |          |       |           |           |
|         | caraway      | 87.00000    | 39.59188 | .566  | -55.7536  | 229.7536  |
|         | Greater ammi | 170.17544*  | 39.59188 | .010  | 27.4218   | 312.9291  |

|      |                      |              |            |          |       |          |          |
|------|----------------------|--------------|------------|----------|-------|----------|----------|
|      |                      | Fennel       | 122.54386  | 39.59188 | .141  | -20.2098 | 265.2975 |
|      |                      | Anise        | 46.05263   | 39.59188 | .987  | -96.7010 | 188.8063 |
|      |                      | Celery       | 375.22807* | 39.59188 | .000  | 232.4744 | 517.9817 |
| ABTS | Coriander            | Coriander    | -7.89107*  | .76265   | .000  | -10.6409 | -5.1412  |
|      |                      | Germany      |            |          |       |          |          |
|      |                      | Dill         | -4.44008*  | .76265   | .000  | -7.1899  | -1.6902  |
|      |                      | Dill Germany | -5.08497*  | .76265   | .000  | -7.8348  | -2.3351  |
|      |                      | Parsley      | -8.10457*  | .76265   | .000  | -10.8544 | -5.3547  |
|      |                      | Parsley      | -5.47930*  | .76265   | .000  | -8.2291  | -2.7295  |
|      |                      | Germany      |            |          |       |          |          |
|      |                      | caraway      | -5.94771*  | .76265   | .000  | -8.6976  | -3.1979  |
|      |                      | Greater ammi | -8.81481*  | .76265   | .000  | -11.5647 | -6.0650  |
|      |                      | Fennel       | -3.47276*  | .76265   | .006  | -6.2226  | -.7229   |
|      |                      | Anise        | -2.61438   | .76265   | .073  | -5.3642  | .1355    |
|      |                      | Celery       | -10.84096* | .76265   | .000  | -13.5908 | -8.0911  |
|      |                      | Visnaga      | -5.17647*  | .76265   | .000  | -7.9263  | -2.4266  |
|      | Coriander<br>Germany | Coriander    | 7.89107*   | .76265   | .000  | 5.1412   | 10.6409  |
|      |                      | Dill         | 3.45098*   | .76265   | .006  | .7011    | 6.2008   |
|      |                      | Dill Germany | 2.80610*   | .76265   | .043  | .0563    | 5.5559   |
|      |                      | Parsley      | -.21351    | .76265   | 1.000 | -2.9633  | 2.5363   |
|      |                      | Parsley      | 2.41176    | .76265   | .124  | -.3381   | 5.1616   |
|      |                      | Germany      |            |          |       |          |          |
|      |                      | caraway      | 1.94336    | .76265   | .359  | -.8065   | 4.6932   |
|      |                      | Greater ammi | -.92375    | .76265   | .983  | -3.6736  | 1.8261   |
|      |                      | Fennel       | 4.41830*   | .76265   | .000  | 1.6685   | 7.1681   |
|      |                      | Anise        | 5.27669*   | .76265   | .000  | 2.5268   | 8.0265   |
|      |                      | Celery       | -2.94989*  | .76265   | .028  | -5.6997  | -.2001   |
|      |                      | Visnaga      | 2.71460    | .76265   | .055  | -.0352   | 5.4644   |
|      | Dill                 | Coriander    | 4.44008*   | .76265   | .000  | 1.6902   | 7.1899   |
|      |                      | Coriander    | -3.45098*  | .76265   | .006  | -6.2008  | -.7011   |
|      |                      | Germany      |            |          |       |          |          |
|      |                      | Dill Germany | -.64488    | .76265   | .999  | -3.3947  | 2.1050   |
|      |                      | Parsley      | -3.66449*  | .76265   | .003  | -6.4143  | -.9146   |
|      |                      | Parsley      | -1.03922   | .76265   | .960  | -3.7891  | 1.7106   |
|      |                      | Germany      |            |          |       |          |          |
|      |                      | caraway      | -1.50763   | .76265   | .703  | -4.2575  | 1.2422   |
|      |                      | Greater ammi | -4.37473*  | .76265   | .000  | -7.1246  | -1.6249  |
|      |                      | Fennel       | .96732     | .76265   | .976  | -1.7825  | 3.7172   |

|                 |                      |           |        |       |         |         |
|-----------------|----------------------|-----------|--------|-------|---------|---------|
|                 | Anise                | 1.82570   | .76265 | .446  | -.9241  | 4.5755  |
|                 | Celery               | -6.40088* | .76265 | .000  | -9.1507 | -3.6510 |
|                 | Visnaga              | -.73639   | .76265 | .997  | -3.4862 | 2.0135  |
| Dill Germany    | Coriander            | 5.08497*  | .76265 | .000  | 2.3351  | 7.8348  |
|                 | Coriander<br>Germany | -2.80610* | .76265 | .043  | -5.5559 | -.0563  |
|                 | Dill                 | .64488    | .76265 | .999  | -2.1050 | 3.3947  |
|                 | Parsley              | -3.01961* | .76265 | .023  | -5.7694 | -.2698  |
|                 | Parsley<br>Germany   | -.39434   | .76265 | 1.000 | -3.1442 | 2.3555  |
|                 | caraway              | -.86274   | .76265 | .990  | -3.6126 | 1.8871  |
|                 | Greater ammi         | -3.72985* | .76265 | .003  | -6.4797 | -.9800  |
|                 | Fennel               | 1.61220   | .76265 | .619  | -1.1376 | 4.3620  |
|                 | Anise                | 2.47059   | .76265 | .107  | -.2793  | 5.2204  |
|                 | Celery               | -5.75599* | .76265 | .000  | -8.5058 | -3.0062 |
|                 | Visnaga              | -.09150   | .76265 | 1.000 | -2.8413 | 2.6583  |
|                 | Coriander            | 8.10457*  | .76265 | .000  | 5.3547  | 10.8544 |
|                 | Coriander<br>Germany | .21351    | .76265 | 1.000 | -2.5363 | 2.9633  |
|                 | Dill                 | 3.66449*  | .76265 | .003  | .9146   | 6.4143  |
|                 | Dill Germany         | 3.01961*  | .76265 | .023  | .2698   | 5.7694  |
| Parsley         | Parsley              | 2.62527   | .76265 | .071  | -.1246  | 5.3751  |
|                 | Parsley<br>Germany   |           |        |       |         |         |
|                 | caraway              | 2.15686   | .76265 | .229  | -.5930  | 4.9067  |
|                 | Greater ammi         | -.71024   | .76265 | .998  | -3.4601 | 2.0396  |
|                 | Fennel               | 4.63181*  | .76265 | .000  | 1.8820  | 7.3817  |
|                 | Anise                | 5.49019*  | .76265 | .000  | 2.7404  | 8.2400  |
|                 | Celery               | -2.73639  | .76265 | .052  | -5.4862 | .0135   |
|                 | Visnaga              | 2.92810*  | .76265 | .030  | .1783   | 5.6779  |
|                 | Coriander            | 5.47930*  | .76265 | .000  | 2.7295  | 8.2291  |
|                 | Coriander<br>Germany | -2.41176  | .76265 | .124  | -5.1616 | .3381   |
|                 | Dill                 | 1.03922   | .76265 | .960  | -1.7106 | 3.7891  |
|                 | Dill Germany         | .39434    | .76265 | 1.000 | -2.3555 | 3.1442  |
|                 | Parsley              | -2.62527  | .76265 | .071  | -5.3751 | .1246   |
|                 | caraway              | -.46841   | .76265 | 1.000 | -3.2182 | 2.2814  |
|                 | Greater ammi         | -3.33551* | .76265 | .009  | -6.0854 | -.5857  |
| Parsley Germany | Fennel               | 2.00654   | .76265 | .317  | -.7433  | 4.7564  |

|              |                      |           |        |       |         |         |
|--------------|----------------------|-----------|--------|-------|---------|---------|
|              | Anise                | 2.86492*  | .76265 | .036  | .1151   | 5.6148  |
|              | Celery               | -5.36166* | .76265 | .000  | -8.1115 | -2.6118 |
|              | Visnaga              | .30283    | .76265 | 1.000 | -2.4470 | 3.0527  |
| caraway      | Coriander            | 5.94771*  | .76265 | .000  | 3.1979  | 8.6976  |
|              | Coriander<br>Germany | -1.94336  | .76265 | .359  | -4.6932 | .8065   |
|              | Dill                 | 1.50763   | .76265 | .703  | -1.2422 | 4.2575  |
|              | Dill Germany         | .86274    | .76265 | .990  | -1.8871 | 3.6126  |
|              | Parsley              | -2.15686  | .76265 | .229  | -4.9067 | .5930   |
|              | Parsley<br>Germany   | .46841    | .76265 | 1.000 | -2.2814 | 3.2182  |
|              | Greater ammi         | -2.86710* | .76265 | .036  | -5.6169 | -.1173  |
|              | Fennel               | 2.47495   | .76265 | .106  | -.2749  | 5.2248  |
|              | Anise                | 3.33333*  | .76265 | .009  | .5835   | 6.0832  |
|              | Celery               | -4.89325* | .76265 | .000  | -7.6431 | -2.1434 |
|              | Visnaga              | .77124    | .76265 | .996  | -1.9786 | 3.5211  |
|              | Coriander            | 8.81481*  | .76265 | .000  | 6.0650  | 11.5647 |
|              | Coriander<br>Germany | .92375    | .76265 | .983  | -1.8261 | 3.6736  |
|              | Dill                 | 4.37473*  | .76265 | .000  | 1.6249  | 7.1246  |
| Greater ammi | Dill Germany         | 3.72985*  | .76265 | .003  | .9800   | 6.4797  |
|              | Parsley              | .71024    | .76265 | .998  | -2.0396 | 3.4601  |
|              | Parsley<br>Germany   | 3.33551*  | .76265 | .009  | .5857   | 6.0854  |
|              | caraway              | 2.86710*  | .76265 | .036  | .1173   | 5.6169  |
|              | Fennel               | 5.34205*  | .76265 | .000  | 2.5922  | 8.0919  |
|              | Anise                | 6.20043*  | .76265 | .000  | 3.4506  | 8.9503  |
|              | Celery               | -2.02615  | .76265 | .304  | -4.7760 | .7237   |
|              | Visnaga              | 3.63834*  | .76265 | .003  | .8885   | 6.3882  |
|              | Coriander            | 3.47276*  | .76265 | .006  | .7229   | 6.2226  |
|              | Coriander<br>Germany | -4.41830* | .76265 | .000  | -7.1681 | -1.6685 |
|              | Dill                 | -.96732   | .76265 | .976  | -3.7172 | 1.7825  |
|              | Dill Germany         | -1.61220  | .76265 | .619  | -4.3620 | 1.1376  |
|              | Parsley              | -4.63181* | .76265 | .000  | -7.3817 | -1.8820 |
|              | Parsley<br>Germany   | -2.00654  | .76265 | .317  | -4.7564 | .7433   |
| Fennel       | caraway              | -2.47495  | .76265 | .106  | -5.2248 | .2749   |



|         |              |           |        |       |          |         |
|---------|--------------|-----------|--------|-------|----------|---------|
|         | Greater ammi | -5.34205* | .76265 | .000  | -8.0919  | -2.5922 |
|         | Anise        | .85838    | .76265 | .990  | -1.8915  | 3.6082  |
|         | Celery       | -7.36820* | .76265 | .000  | -10.1180 | -4.6184 |
|         | Visnaga      | -1.70371  | .76265 | .543  | -4.4535  | 1.0461  |
| Anise   | Coriander    | 2.61438   | .76265 | .073  | -.1355   | 5.3642  |
|         | Coriander    | -5.27669* | .76265 | .000  | -8.0265  | -2.5268 |
|         | Germany      |           |        |       |          |         |
|         | Dill         | -1.82570  | .76265 | .446  | -4.5755  | .9241   |
|         | Dill Germany | -2.47059  | .76265 | .107  | -5.2204  | .2793   |
|         | Parsley      | -5.49019* | .76265 | .000  | -8.2400  | -2.7404 |
|         | Parsley      | -2.86492* | .76265 | .036  | -5.6148  | -.1151  |
|         | Germany      |           |        |       |          |         |
|         | caraway      | -3.33333* | .76265 | .009  | -6.0832  | -.5835  |
|         | Greater ammi | -6.20043* | .76265 | .000  | -8.9503  | -3.4506 |
|         | Fennel       | -.85838   | .76265 | .990  | -3.6082  | 1.8915  |
|         | Celery       | -8.22658* | .76265 | .000  | -10.9764 | -5.4767 |
|         | Visnaga      | -2.56209  | .76265 | .084  | -5.3119  | .1878   |
| Celery  | Coriander    | 10.84096* | .76265 | .000  | 8.0911   | 13.5908 |
|         | Coriander    | 2.94989*  | .76265 | .028  | .2001    | 5.6997  |
|         | Germany      |           |        |       |          |         |
|         | Dill         | 6.40088*  | .76265 | .000  | 3.6510   | 9.1507  |
|         | Dill Germany | 5.75599*  | .76265 | .000  | 3.0062   | 8.5058  |
|         | Parsley      | 2.73639   | .76265 | .052  | -.0135   | 5.4862  |
|         | Parsley      | 5.36166*  | .76265 | .000  | 2.6118   | 8.1115  |
|         | Germany      |           |        |       |          |         |
|         | caraway      | 4.89325*  | .76265 | .000  | 2.1434   | 7.6431  |
|         | Greater ammi | 2.02615   | .76265 | .304  | -.7237   | 4.7760  |
|         | Fennel       | 7.36820*  | .76265 | .000  | 4.6184   | 10.1180 |
|         | Anise        | 8.22658*  | .76265 | .000  | 5.4767   | 10.9764 |
|         | Visnaga      | 5.66449*  | .76265 | .000  | 2.9146   | 8.4143  |
| Visnaga | Coriander    | 5.17647*  | .76265 | .000  | 2.4266   | 7.9263  |
|         | Coriander    | -2.71460  | .76265 | .055  | -5.4644  | .0352   |
|         | Germany      |           |        |       |          |         |
|         | Dill         | .73639    | .76265 | .997  | -2.0135  | 3.4862  |
|         | Dill Germany | .09150    | .76265 | 1.000 | -2.6583  | 2.8413  |
|         | Parsley      | -2.92810* | .76265 | .030  | -5.6779  | -.1783  |
|         | Parsley      | -.30283   | .76265 | 1.000 | -3.0527  | 2.4470  |
|         | Germany      |           |        |       |          |         |

|        |                      |              |            |         |       |          |          |
|--------|----------------------|--------------|------------|---------|-------|----------|----------|
|        |                      | caraway      | -1.77124   | .76265  | .996  | -3.5211  | 1.9786   |
|        |                      | Greater ammi | -3.63834*  | .76265  | .003  | -6.3882  | -.8885   |
|        |                      | Fennel       | 1.70371    | .76265  | .543  | -1.0461  | 4.4535   |
|        |                      | Anise        | 2.56209    | .76265  | .084  | -.1878   | 5.3119   |
|        |                      | Celery       | -5.66449*  | .76265  | .000  | -8.4143  | -2.9146  |
| CUPRAC | Coriander            | Coriander    | 27.08235*  | 5.00576 | .001  | 9.0335   | 45.1313  |
|        |                      | Germany      |            |         |       |          |          |
|        |                      | Dill         | 11.85098   | 5.00576 | .461  | -6.1979  | 29.8999  |
|        |                      | Dill Germany | 17.78823   | 5.00576 | .056  | -.2607   | 35.8371  |
|        |                      | Parsley      | 18.91372*  | 5.00576 | .034  | .8648    | 36.9626  |
|        |                      | Parsley      | 16.16471   | 5.00576 | .109  | -1.8842  | 34.2136  |
|        |                      | Germany      |            |         |       |          |          |
|        |                      | caraway      | -14.45490  | 5.00576 | .207  | -32.5038 | 3.5940   |
|        |                      | Greater ammi | 11.34117   | 5.00576 | .523  | -6.7077  | 29.3901  |
|        |                      | Fennel       | -20.17255* | 5.00576 | .019  | -38.2215 | -2.1236  |
|        |                      | Anise        | -18.93333* | 5.00576 | .034  | -36.9822 | -.8844   |
|        |                      | Celery       | 9.12941    | 5.00576 | .791  | -8.9195  | 27.1783  |
|        |                      | Visnaga      | -.16471    | 5.00576 | 1.000 | -18.2136 | 17.8842  |
|        | Coriander<br>Germany | Coriander    | -27.08235* | 5.00576 | .001  | -45.1313 | -9.0335  |
|        |                      | Dill         | -15.23137  | 5.00576 | .156  | -33.2803 | 2.8175   |
|        |                      | Dill Germany | -9.29412   | 5.00576 | .773  | -27.3430 | 8.7548   |
|        |                      | Parsley      | -8.16863   | 5.00576 | .881  | -26.2175 | 9.8803   |
|        |                      | Parsley      | -10.91765  | 5.00576 | .576  | -28.9665 | 7.1313   |
|        |                      | Germany      |            |         |       |          |          |
|        |                      | caraway      | -41.53726* | 5.00576 | .000  | -59.5862 | -23.4884 |
|        |                      | Greater ammi | -15.74118  | 5.00576 | .129  | -33.7901 | 2.3077   |
|        |                      | Fennel       | -47.25490* | 5.00576 | .000  | -65.3038 | -29.2060 |
|        |                      | Anise        | -46.01569* | 5.00576 | .000  | -64.0646 | -27.9668 |
|        | Dill                 | Celery       | -17.95294  | 5.00576 | .052  | -36.0018 | .0960    |
|        |                      | Visnaga      | -27.24706* | 5.00576 | .001  | -45.2960 | -9.1982  |
|        |                      | Coriander    | -11.85098  | 5.00576 | .461  | -29.8999 | 6.1979   |
|        |                      | Coriander    | 15.23137   | 5.00576 | .156  | -2.8175  | 33.2803  |
|        |                      | Germany      |            |         |       |          |          |
|        |                      | Dill Germany | 5.93725    | 5.00576 | .985  | -12.1116 | 23.9862  |
|        |                      | Parsley      | 7.06274    | 5.00576 | .950  | -10.9862 | 25.1116  |
|        |                      | Parsley      | 4.31373    | 5.00576 | .999  | -13.7352 | 22.3626  |
|        |                      | Germany      |            |         |       |          |          |
|        |                      | caraway      | -26.30588* | 5.00576 | .001  | -44.3548 | -8.2570  |

|                 |                      |            |         |       |          |          |
|-----------------|----------------------|------------|---------|-------|----------|----------|
|                 | Greater ammi         | -50981     | 5.00576 | 1.000 | -18.5587 | 17.5391  |
|                 | Fennel               | -32.02353* | 5.00576 | .000  | -50.0724 | -13.9746 |
|                 | Anise                | -30.78431* | 5.00576 | .000  | -48.8332 | -12.7354 |
|                 | Celery               | -2.72157   | 5.00576 | 1.000 | -20.7705 | 15.3273  |
|                 | Visnaga              | -12.01569  | 5.00576 | .442  | -30.0646 | 6.0332   |
| Dill Germany    | Coriander            | -17.78823  | 5.00576 | .056  | -35.8371 | .2607    |
|                 | Coriander<br>Germany | 9.29412    | 5.00576 | .773  | -8.7548  | 27.3430  |
|                 | Dill                 | -5.93725   | 5.00576 | .985  | -23.9862 | 12.1116  |
|                 | Parsley              | 1.12549    | 5.00576 | 1.000 | -16.9234 | 19.1744  |
|                 | Parsley<br>Germany   | -1.62353   | 5.00576 | 1.000 | -19.6724 | 16.4254  |
|                 | caraway              | -32.24314* | 5.00576 | .000  | -50.2920 | -14.1942 |
|                 | Greater ammi         | -6.44706   | 5.00576 | .973  | -24.4960 | 11.6018  |
|                 | Fennel               | -37.96078* | 5.00576 | .000  | -56.0097 | -19.9119 |
|                 | Anise                | -36.72157* | 5.00576 | .000  | -54.7705 | -18.6727 |
|                 | Celery               | -8.65882   | 5.00576 | .838  | -26.7077 | 9.3901   |
| Parsley         | Visnaga              | -17.95294  | 5.00576 | .052  | -36.0018 | .0960    |
|                 | Coriander            | -18.91372* | 5.00576 | .034  | -36.9626 | -.8648   |
|                 | Coriander<br>Germany | 8.16863    | 5.00576 | .881  | -9.8803  | 26.2175  |
|                 | Dill                 | -7.06274   | 5.00576 | .950  | -25.1116 | 10.9862  |
|                 | Dill Germany         | -1.12549   | 5.00576 | 1.000 | -19.1744 | 16.9234  |
|                 | Parsley              | -2.74902   | 5.00576 | 1.000 | -20.7979 | 15.2999  |
|                 | Parsley<br>Germany   |            |         |       |          |          |
|                 | caraway              | -33.36863* | 5.00576 | .000  | -51.4175 | -15.3197 |
|                 | Greater ammi         | -7.57255   | 5.00576 | .923  | -25.6215 | 10.4764  |
|                 | Fennel               | -39.08627* | 5.00576 | .000  | -57.1352 | -21.0374 |
| Parsley Germany | Anise                | -37.84706* | 5.00576 | .000  | -55.8960 | -19.7982 |
|                 | Celery               | -9.78431   | 5.00576 | .717  | -27.8332 | 8.2646   |
|                 | Visnaga              | -19.07843* | 5.00576 | .032  | -37.1273 | -1.0295  |
|                 | Coriander            | -16.16471  | 5.00576 | .109  | -34.2136 | 1.8842   |
|                 | Coriander<br>Germany | 10.91765   | 5.00576 | .576  | -7.1313  | 28.9665  |
|                 | Dill                 | -4.31373   | 5.00576 | .999  | -22.3626 | 13.7352  |
|                 | Dill Germany         | 1.62353    | 5.00576 | 1.000 | -16.4254 | 19.6724  |
|                 | Parsley              | 2.74902    | 5.00576 | 1.000 | -15.2999 | 20.7979  |
|                 | caraway              | -30.61961* | 5.00576 | .000  | -48.6685 | -12.5707 |
|                 |                      |            |         |       |          |          |

|              |              |            |         |       |          |          |
|--------------|--------------|------------|---------|-------|----------|----------|
|              | Greater ammi | -4.82353   | 5.00576 | .997  | -22.8724 | 13.2254  |
|              | Fennel       | -36.33726* | 5.00576 | .000  | -54.3862 | -18.2884 |
|              | Anise        | -35.09804* | 5.00576 | .000  | -53.1469 | -17.0491 |
|              | Celery       | -7.03530   | 5.00576 | .951  | -25.0842 | 11.0136  |
|              | Visnaga      | -16.32941  | 5.00576 | .102  | -34.3783 | 1.7195   |
| caraway      | Coriander    | 14.45490   | 5.00576 | .207  | -3.5940  | 32.5038  |
|              | Coriander    | 41.53726*  | 5.00576 | .000  | 23.4884  | 59.5862  |
|              | Germany      |            |         |       |          |          |
|              | Dill         | 26.30588*  | 5.00576 | .001  | 8.2570   | 44.3548  |
|              | Dill Germany | 32.24314*  | 5.00576 | .000  | 14.1942  | 50.2920  |
|              | Parsley      | 33.36863*  | 5.00576 | .000  | 15.3197  | 51.4175  |
|              | Parsley      | 30.61961*  | 5.00576 | .000  | 12.5707  | 48.6685  |
|              | Germany      |            |         |       |          |          |
|              | Greater ammi | 25.79608*  | 5.00576 | .001  | 7.7472   | 43.8450  |
|              | Fennel       | -5.71765   | 5.00576 | .989  | -23.7665 | 12.3313  |
|              | Anise        | -4.47843   | 5.00576 | .999  | -22.5273 | 13.5705  |
|              | Celery       | 23.58431*  | 5.00576 | .004  | 5.5354   | 41.6332  |
|              | Visnaga      | 14.29020   | 5.00576 | .219  | -3.7587  | 32.3391  |
| Greater ammi | Coriander    | -11.34117  | 5.00576 | .523  | -29.3901 | 6.7077   |
|              | Coriander    | 15.74118   | 5.00576 | .129  | -2.3077  | 33.7901  |
|              | Germany      |            |         |       |          |          |
|              | Dill         | .50981     | 5.00576 | 1.000 | -17.5391 | 18.5587  |
|              | Dill Germany | 6.44706    | 5.00576 | .973  | -11.6018 | 24.4960  |
|              | Parsley      | 7.57255    | 5.00576 | .923  | -10.4764 | 25.6215  |
|              | Parsley      | 4.82353    | 5.00576 | .997  | -13.2254 | 22.8724  |
|              | Germany      |            |         |       |          |          |
|              | caraway      | -25.79608* | 5.00576 | .001  | -43.8450 | -7.7472  |
|              | Fennel       | -31.51372* | 5.00576 | .000  | -49.5626 | -13.4648 |
|              | Anise        | -30.27451* | 5.00576 | .000  | -48.3234 | -12.2256 |
|              | Celery       | -2.21176   | 5.00576 | 1.000 | -20.2607 | 15.8371  |
|              | Visnaga      | -11.50588  | 5.00576 | .503  | -29.5548 | 6.5430   |
| Fennel       | Coriander    | 20.17255*  | 5.00576 | .019  | 2.1236   | 38.2215  |
|              | Coriander    | 47.25490*  | 5.00576 | .000  | 29.2060  | 65.3038  |
|              | Germany      |            |         |       |          |          |
|              | Dill         | 32.02353*  | 5.00576 | .000  | 13.9746  | 50.0724  |
|              | Dill Germany | 37.96078*  | 5.00576 | .000  | 19.9119  | 56.0097  |
|              | Parsley      | 39.08627*  | 5.00576 | .000  | 21.0374  | 57.1352  |

|         |              |            |         |       |          |          |
|---------|--------------|------------|---------|-------|----------|----------|
|         | Parsley      | 36.33726*  | 5.00576 | .000  | 18.2884  | 54.3862  |
|         | Germany      |            |         |       |          |          |
|         | caraway      | 5.71765    | 5.00576 | .989  | -12.3313 | 23.7665  |
|         | Greater ammi | 31.51372*  | 5.00576 | .000  | 13.4648  | 49.5626  |
|         | Anise        | 1.23922    | 5.00576 | 1.000 | -16.8097 | 19.2881  |
|         | Celery       | 29.30196*  | 5.00576 | .000  | 11.2531  | 47.3509  |
|         | Visnaga      | 20.00784*  | 5.00576 | .021  | 1.9589   | 38.0567  |
| Anise   | Coriander    | 18.93333*  | 5.00576 | .034  | .8844    | 36.9822  |
|         | Coriander    | 46.01569*  | 5.00576 | .000  | 27.9668  | 64.0646  |
|         | Germany      |            |         |       |          |          |
|         | Dill         | 30.78431*  | 5.00576 | .000  | 12.7354  | 48.8332  |
|         | Dill Germany | 36.72157*  | 5.00576 | .000  | 18.6727  | 54.7705  |
|         | Parsley      | 37.84706*  | 5.00576 | .000  | 19.7982  | 55.8960  |
|         | Parsley      | 35.09804*  | 5.00576 | .000  | 17.0491  | 53.1469  |
|         | Germany      |            |         |       |          |          |
|         | caraway      | 4.47843    | 5.00576 | .999  | -13.5705 | 22.5273  |
|         | Greater ammi | 30.27451*  | 5.00576 | .000  | 12.2256  | 48.3234  |
|         | Fennel       | -1.23922   | 5.00576 | 1.000 | -19.2881 | 16.8097  |
|         | Celery       | 28.06274*  | 5.00576 | .000  | 10.0138  | 46.1116  |
|         | Visnaga      | 18.76863*  | 5.00576 | .037  | .7197    | 36.8175  |
| Celery  | Coriander    | -9.12941   | 5.00576 | .791  | -27.1783 | 8.9195   |
|         | Coriander    | 17.95294   | 5.00576 | .052  | -.0960   | 36.0018  |
|         | Germany      |            |         |       |          |          |
|         | Dill         | 2.72157    | 5.00576 | 1.000 | -15.3273 | 20.7705  |
|         | Dill Germany | 8.65882    | 5.00576 | .838  | -9.3901  | 26.7077  |
|         | Parsley      | 9.78431    | 5.00576 | .717  | -8.2646  | 27.8332  |
|         | Parsley      | 7.03530    | 5.00576 | .951  | -11.0136 | 25.0842  |
|         | Germany      |            |         |       |          |          |
|         | caraway      | -23.58431* | 5.00576 | .004  | -41.6332 | -5.5354  |
|         | Greater ammi | 2.21176    | 5.00576 | 1.000 | -15.8371 | 20.2607  |
|         | Fennel       | -29.30196* | 5.00576 | .000  | -47.3509 | -11.2531 |
|         | Anise        | -28.06274* | 5.00576 | .000  | -46.1116 | -10.0138 |
|         | Visnaga      | -9.29412   | 5.00576 | .773  | -27.3430 | 8.7548   |
| Visnaga | Coriander    | .16471     | 5.00576 | 1.000 | -17.8842 | 18.2136  |
|         | Coriander    | 27.24706*  | 5.00576 | .001  | 9.1982   | 45.2960  |
|         | Germany      |            |         |       |          |          |
|         | Dill         | 12.01569   | 5.00576 | .442  | -6.0332  | 30.0646  |
|         | Dill Germany | 17.95294   | 5.00576 | .052  | -.0960   | 36.0018  |

---

|              |            |         |      |          |         |
|--------------|------------|---------|------|----------|---------|
| Parsley      | 19.07843*  | 5.00576 | .032 | 1.0295   | 37.1273 |
| Parsley      | 16.32941   | 5.00576 | .102 | -1.7195  | 34.3783 |
| Germany      |            |         |      |          |         |
| caraway      | -14.29020  | 5.00576 | .219 | -32.3391 | 3.7587  |
| Greater ammi | 11.50588   | 5.00576 | .503 | -6.5430  | 29.5548 |
| Fennel       | -20.00784* | 5.00576 | .021 | -38.0567 | -1.9589 |
| Anise        | -18.76863* | 5.00576 | .037 | -36.8175 | -.7197  |
| Celery       | 9.29412    | 5.00576 | .773 | -8.7548  | 27.3430 |

---

\*, The mean difference is significant at the 0.05 level.
